# Supplementary material for: Development of DACN-NHS-ester and DACN-maleimide, and their application for the synthesis of artificial hybrid biomolecules
Source: Royal Society of Chemistry journal article supplement (doi:10.1039/d3cc03023g), 2023-01-01
Supplement: d3cc03023g1.pdf [file d3cc03023g1.pdf]

## Development of DACN-NHS ester and DACN-maleimide, and their application for the synthesis of artificial hybrid biomolecules

Yuuya Kawasaki,<sup>a</sup> Tomoya Hayashibara,<sup>b</sup> Yuki Seto,<sup>b</sup> Yutaro Taniguchi,<sup>b</sup>  
Kazunobu Igawa<sup>a,b</sup> and Katsuhiko Tomooka<sup>\*,a,b</sup>

*<sup>a</sup>Institute for Materials Chemistry and Engineering, and IRCCS,  
Kyushu University, 6-1 Kasuga-koen, Kasuga, Fukuoka 816-8580, Japan*

*<sup>b</sup>Department of Molecular and Material Sciences,  
Kyushu University, 6-1 Kasuga-koen, Kasuga, Fukuoka 816-8580, Japan*

E-mail: ktomooka@cm.kyushu-u.ac.jp

### Table of Contents:

|                                                     |         |
|-----------------------------------------------------|---------|
| 1. General Method                                   | S2      |
| 2. Detailed Reaction Procedures and Analytical Data | S3-S18  |
| 3. Kinetic Study on CFAAC                           | S19-S21 |
| 4. LCMS Analysis of Connection of Biomolecules      | S22-S30 |
| 5. <sup>1</sup> H, <sup>13</sup> C NMR Spectra      | S30-S43 |
| 6. Control Experiments                              | S44-S54 |
| 7. References                                       | S55     |

## 1. General Method

All reactions were carried out in heat-gun-dried glassware under an argon atmosphere unless otherwise noted. Dry  $\text{CH}_2\text{Cl}_2$ ,  $\text{CH}_3\text{CN}$ , DMF, THF were purchased from Kanto Chemical Co., Inc. and used without purification.  $^1\text{H}$  NMR spectra were recorded on Varian Mercury spectrometer (300 MHz) or JEOL JNM-ECA600 (600 MHz) and  $^{13}\text{C}$  NMR spectra were recorded on Varian Mercury spectrometer (75 MHz), JEOL JNM-ECZ400S (100 MHz) or JEOL JNM-ECA600 (150 MHz) at ambient temperature using  $\text{CDCl}_3$ ,  $\text{DMSO-d}_6$  as a solvent. Chemical shifts ( $\delta$ ) in parts per million were referenced to the solvent residual peak as an internal standard:  $\text{CHCl}_3$  for  $^1\text{H}$  NMR ( $\delta$  7.26) and  $\text{CDCl}_3$  for  $^{13}\text{C}$  NMR ( $\delta$  77.1),  $\text{DMSO-d}_5$  for  $^1\text{H}$  NMR ( $\delta$  2.50) and  $\text{DMSO-d}_6$  for  $^{13}\text{C}$  NMR ( $\delta$  39.5), acetonitrile- $\text{d}_2$  for  $^1\text{H}$  NMR ( $\delta$  1.94) and acetonitrile- $\text{d}_3$  for  $^{13}\text{C}$  NMR ( $\delta$  118.3). The peak multiplicities were given as follows: s, singlet; d, doublet; t, triplet; m, multiplet; br, broad. Infrared spectra (IR) were recorded on a Fourier transfer infrared spectrophotometer (Perkin Elmer SpectrumOne) as crystals with a diffuse reflector or attenuated total reflection (JASCO, FT/IR-4600). X-ray crystallographic data were collected using a Rigaku Saturn724 diffractometer using multi-layer mirror monochromated  $\text{Mo-K}\alpha$  radiation ( $\lambda = 0.71075 \text{ \AA}$ ) to a maximum  $2\theta$  value of  $55.0^\circ$ . Melting points (mp) were measured on a Yanaco Micro Melting Point Apparatus. Analytical thin-layer chromatography (TLC) was carried out on silica gel 60  $\text{F}_{254}$  (Merck 5715) plates and developed plates were visualized by UV (254 nm) and by heating on a hot plate after staining with a 4% solution of phosphomolybdic acid in ethanol or a 2.5% solution of *p*-anisaldehyde in ethanol. Column chromatography was performed using Fuji Silysia silica gel FL100D (neutral). PTLC was performed using Merck Silica gel 60  $\text{PF}_{254}$  for preparative thin layer chromatography. HRMS analyses were recorded on a JEOL JMS-700 at the Analytical Center in IMCE, Kyushu University.

## 2. Detailed Reaction Procedures and Analytical Data

### Synthesis of NTs-DACN-NHS-ester (**1a**)

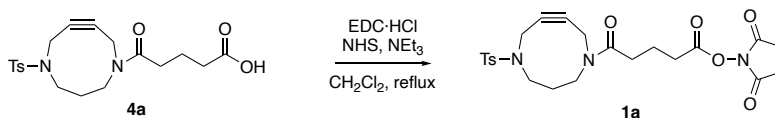

Synthesis and analytical data of NTs,*N'*Gul-DACN (**4a**) were reported.<sup>[1]</sup>

To a solution of **4a** (200 mg, 0.510 mmol) in CH<sub>2</sub>Cl<sub>2</sub> (4 mL) were added *N*-hydroxysuccinimide (106 mg, 0.921 mmol), EDC·HCl (178 mg, 0.929 mmol), and NEt<sub>3</sub> (254  $\mu$ L, 1.82 mmol) at 0 °C. After the mixture had been stirred under reflux for 3 h, the reaction was quenched with 1M aq. HCl and extracted three times with CH<sub>2</sub>Cl<sub>2</sub>. The combined organic phases were washed with brine, dried over Na<sub>2</sub>SO<sub>4</sub>, filtered, and the filtrate was concentrated under reduced pressure. The residue was purified by silica-gel chromatography (CHCl<sub>3</sub>) to afford 175 mg (70%) of **1a** as colorless crystals.

<sup>1</sup>H NMR (300 MHz, CDCl<sub>3</sub>, compound exists as a 65:35 mixture of rotational isomers):  $\delta$  7.66 (d,  $J$  = 8.0 Hz, 2H), 7.33 (d,  $J$  = 8.0 Hz, 2H), 4.22 (t,  $J$  = 2.5 Hz, 1.3H), 4.04 (t,  $J$  = 2.5 Hz, 0.7H), 3.86 (t,  $J$  = 2.8 Hz, 2H), 3.57 (t,  $J$  = 5.5 Hz, 2H), 3.27 (t,  $J$  = 5.8 Hz, 1.3H), 3.17 (t,  $J$  = 5.8 Hz, 0.7H), 2.85 (s, 2.6H), 2.82 (s, 1.4H), 2.68-2.77 (m, 2H), 2.43-2.50 (m, 5H), 2.04-2.14 (m, 4H).

<sup>13</sup>C NMR (150 MHz, CDCl<sub>3</sub>):  $\delta$  172.22, 171.08, 169.18, 168.52, 143.99, 143.86, 134.64, 134.54, 130.00, 129.96, 127.42, 127.36, 89.25, 88.54, 88.33, 86.67, 45.48, 45.44, 43.85, 41.05, 40.74, 39.50, 36.63, 32.30, 31.81, 30.26, 30.11, 25.67, 21.63, 20.39, 20.11. (2 carbonyl and 5 aliphatic carbons were overlapping)

IR (reflection): 2946, 1784, 1739, 1644, 1428, 1337, 1160, 816, 754 cm<sup>-1</sup>.

mp: 64.6-65.3 °C.

HRMS (EI, positive): Exact mass calc. for C<sub>23</sub>H<sub>27</sub>N<sub>3</sub>O<sub>7</sub>S [M]<sup>+</sup>, requires  $m/z$ : 489.1570, found  $m/z$ : 489.1570.

## Synthesis of NMs-DACN-NHS-ester (**1b**)

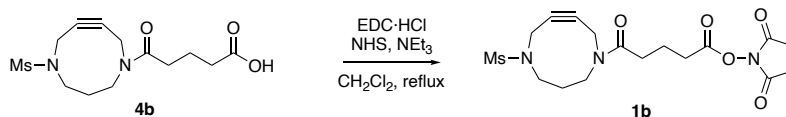

Synthesis and analytical data of NMs,*N*'Gul-DACN (**4b**) were reported.<sup>[1]</sup>

To a solution of **4b** (3.29 g, 10.4 mmol) in CH<sub>2</sub>Cl<sub>2</sub> (70 mL) were added *N*-hydroxysuccinimide (2.15 g, 18.7 mmol), EDC·HCl (3.58 g, 18.7 mmol), and NEt<sub>3</sub> (5.21 mL, 37.4 mmol) at 0 °C. After the mixture had been stirred under reflux for 3 h, the reaction was quenched with 1M aq. HCl and extracted three times with CH<sub>2</sub>Cl<sub>2</sub>. The combined organic phases were washed with brine, dried over Na<sub>2</sub>SO<sub>4</sub>, filtered, and the filtrate was concentrated under reduced pressure. The residue was purified by recrystallization from AcOEt-Et<sub>2</sub>O to afford 3.45 g (80%) of **1b** as colorless crystals.

<sup>1</sup>H NMR (300 MHz, CDCl<sub>3</sub>, compound exists as a 60:40 mixture of rotational isomers): δ 4.23, (t, *J* = 3.0 Hz, 1.2H), 4.06 (t, *J* = 3.0 Hz, 0.8H), 3.94 (t, *J* = 3.0 Hz, 1.2H), 3.91 (t, *J* = 3.0 Hz, 0.8H), 3.57 (t, *J* = 6.0 Hz, 2H), 3.39 (t, *J* = 6.0 Hz, 1.2H), 3.28 (t, *J* = 6.0 Hz, 0.8H), 2.83 (s, 1.8H), 2.82 (s, 1.2H), 2.81 (s, 2.4H), 2.80 (s, 1.6H), 2.69 (t, *J* = 3.0 Hz), 2.48-2.43 (m, 2H), 2.11-2.02 (m, 4H).

<sup>13</sup>C NMR (100 MHz, CDCl<sub>3</sub>): δ 172.07, 171.20, 169.32, 168.55, 89.42, 88.91, 88.04, 86.47, 45.80, 45.57, 44.14, 43.83, 40.47, 40.14, 39.47, 36.89, 36.57, 36.40, 32.24, 31.81, 31.73, 30.21, 30.16, 25.67, 20.33, 20.07. (2 aliphatic carbons were overlapping)

IR (ATR): 3472, 2934, 2361, 1815, 1738, 1620, 1320, 1146, 905, 727 cm<sup>-1</sup>.

mp: 110.7-111.1 °C.

HRMS (EI, positive): Exact mass calc. for C<sub>17</sub>H<sub>23</sub>N<sub>3</sub>O<sub>7</sub>S [M]<sup>+</sup>, requires *m/z*: 413.1257, found *m/z*: 413.1254.



### Synthesis of NTs-DACN-maleimide (2a)

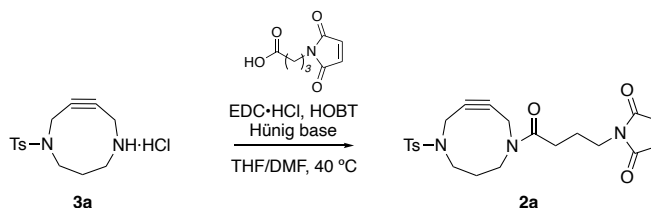

Synthesis and analytical data of NTs, *N'*H-DACN·HCl (**3a**) were reported.<sup>[1]</sup>

To a solution of **3a** (139 mg, 0.443 mmol) in THF (2.5 mL) / DMF (0.5 mL) were added 4-maleimidobutyric acid (89.4 mg, 0.489 mmol), EDC·HCl (127 mg, 0.661 mmol), HOBT (66.2 mg, 0.490 mmol) and Hünig base (303  $\mu$ L, 1.74 mmol) at 0 °C. After the mixture had been stirred at 40 °C for 12 h, the reaction was quenched with sat. aq. NH<sub>4</sub>Cl and extracted with CH<sub>2</sub>Cl<sub>2</sub>. The combined organic phases were washed with brine, dried over Na<sub>2</sub>SO<sub>4</sub>, filtered, and the filtrate was concentrated under reduced pressure. The residue was purified by silica-gel chromatography (CHCl<sub>3</sub>) to afford 101 mg (53%) of **2a** as colorless crystals.

<sup>1</sup>H NMR (300 MHz, DMSO-d<sub>6</sub>, compound exists as a 50:50 mixture of rotational isomers): δ 7.73 (d, *J* = 8.5 Hz, 2H), 7.47 (d, *J* = 8.5 Hz, 2H), 7.03 (s, 1H), 7.01 (s, 1H), 4.15 (s, 1H), 4.12 (s, 1H), 3.95 (s, 1H), 3.91 (s, 1H), 3.48-3.39 (m, 4H), 3.21 (t, *J* = 5.5 Hz, 1H), 3.15 (t, *J* = 5.8 Hz, 1H), 2.44 (s, 3H), 2.32 (m, 2H), 1.99-1.91 (m, 2H), 1.81-1.71 (m, 2H).

<sup>13</sup>C NMR (75 MHz, DMSO-d<sub>6</sub>): δ 171.51, 171.15, 171.01, 143.57, 134.81, 134.64, 134.58, 134.45, 129.99, 127.15, 127.04, 89.65, 89.35, 87.72, 87.04, 45.67, 45.08, 43.66, 42.96, 40.64, 36.76, 35.68, 31.49, 29.99, 29.93, 29.84, 29.70, 23.58, 23.31, 20.99. (1 carbonyl, 2 aromatic and 1 aliphatic carbons were overlapping)

IR (reflection): 3387, 2933, 1704, 1638, 1448, 1412, 1354, 914  $\text{cm}^{-1}$ .

mp: 119.8-120.5 °C.

HRMS (EI, positive): Exact mass calc. for  $\text{C}_{22}\text{H}_{25}\text{N}_3\text{O}_5\text{S} [\text{M}]^+$ , requires  $m/z$ : 443.1515, found  $m/z$ : 443.1516.

## Synthesis of NMs-DACN-maleimide (**2b**)

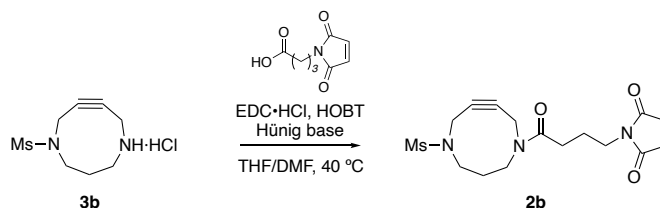

Synthesis and analytical data of NMs,N'-H-DACN·HCl (**3b**) were reported.<sup>[1]</sup>

To a solution of **3b** (4.20 g, 17.6 mmol) in THF (100 mL) / DMF (20 mL) were added 4-maleimidobutyric acid (3.55 g, 19.4 mmol), EDC·HCl (5.06 g, 26.4 mmol), HOBT (2.63 g, 19.4 mmol) and Hünig base (12.0 mL, 68.9 mmol) at 0 °C. After the mixture had been stirred at 40 °C for 7 h, the reaction was quenched with sat. aq. NH<sub>4</sub>Cl and extracted with CH<sub>2</sub>Cl<sub>2</sub>. The combined organic phases were washed with brine, dried over Na<sub>2</sub>SO<sub>4</sub>, filtered, and the filtrate was concentrated under reduced pressure. The residue was purified by silica-gel chromatography (CHCl<sub>3</sub>) to afford 4.58 g (71%) of **2b** as colorless crystals.

<sup>1</sup>H NMR (300 MHz, CDCl<sub>3</sub>, compound exists as a 60:40 mixture of rotational isomers): δ 6.69 (s, 1.2H), 6.69 (s, 0.8H), 4.25 (t, *J* = 3.0 Hz, 1.2 H, 1.2 Hz), 4.02 (t, *J* = 3.0 Hz, 0.8 H), 3.98-3.95 (m, 2H), 3.61-3.55 (m, 4H), 3.43 (t, *J* = 6.0 Hz, 1.2H), 3.36 (t, *J* = 6.0 Hz, 0.8H), 2.86 (s, 1.8H), 2.85 (s, 1.2H), 2.32 (t, *J* = 6.0 Hz, 2H), 2.04-1.90 (m, 4H).

<sup>13</sup>C NMR (75 MHz, CDCl<sub>3</sub>): δ 172.07, 171.11, 170.96, 170.93, 134.20, 89.60, 88.87, 88.19, 86.35, 45.66, 45.48, 44.01, 43.80, 40.46, 40.24, 39.45, 37.40, 37.37, 36.80, 36.62, 36.46, 32.21, 30.94, 30.92, 30.12, 24.10, 23.85. (1 olefine carbon was overlapping)

IR (ATR): 3451, 3087, 2933, 1698, 1635, 1411, 1318, 1144, 837 cm<sup>-1</sup>.

mp: decomposed at 151.0 °C.

HRMS (EI, positive): Exact mass calc. for C<sub>16</sub>H<sub>21</sub>N<sub>3</sub>O<sub>5</sub>S [M]<sup>+</sup>, requires *m/z*: 367.1202, found *m/z*: 367.1201.

### Amidation of **1a** with Benzyl Amine

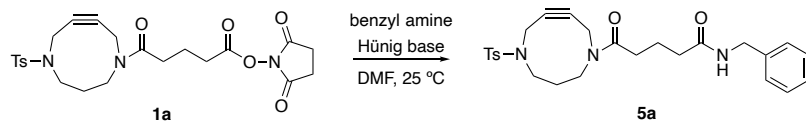

To a solution of **1a** (20.0 mg, 0.0409 mmol) in DMF (2 mL) added benzyl amine (4.47  $\mu$ L, 0.0409 mmol) and Hünig base (14.1  $\mu$ L, 0.0818 mmol) at 25 °C. After the mixture had been stirred at that temperature for 6 h, the reaction was quenched with H<sub>2</sub>O and extracted three times with AcOEt. The combined organic phases were washed with brine, dried over Na<sub>2</sub>SO<sub>4</sub>, filtered, and the filtrate was concentrated under reduced pressure. The residue was purified by preparative TLC (CHCl<sub>3</sub>/MeOH = 20:1) to afford 18.7 mg (95%) of **5a** as colorless crystals.

<sup>1</sup>H NMR (300 MHz, CDCl<sub>3</sub>, compound exists as a 80:20 mixture of rotational isomers):  $\delta$  7.66 (d,  $J$  = 8.2 Hz, 2H), 7.35-7.26 (m, 7H), 6.34-5.89 (br, 1H), 4.44-4.41 (m, 2H), 4.19 (t,  $J$  = 2.3 Hz, 1.2H), 4.02 (t,  $J$  = 2.3 Hz, 0.8H), 3.87-3.84 (m, 2H), 3.55 (t,  $J$  = 5.6 Hz, 2H), 3.24 (t,  $J$  = 5.6 Hz, 1.2H), 3.15 (t,  $J$  = 5.6 Hz, 0.8H), 2.44-2.28 (m, 7H), 2.12-1.93 (m, 4H).

<sup>13</sup>C NMR (100 MHz, CDCl<sub>3</sub>):  $\delta$  173.01, 172.38, 172.05, 144.00, 143.89, 138.38, 138.34, 134.48, 134.34, 129.99, 129.94, 128.71, 127.80, 127.51, 127.36, 127.28, 89.13, 88.45, 88.29, 86.65, 45.45, 45.40, 43.86, 43.79, 43.54, 41.03, 40.70, 39.67, 36.50, 35.43, 35.26, 32.90, 32.53, 32.34, 30.08, 21.60, 21.34, 21.01. (1 carbonyl, 5 aromatic and 2 aliphatic carbons were overlapping)

IR (reflection): 3312, 2924, 1631, 1542, 1416, 1331, 1154, 916 cm<sup>-1</sup>.

mp: 69.2-70.2 °C.

HRMS (EI, positive): Exact mass calc. for C<sub>26</sub>H<sub>31</sub>N<sub>3</sub>O<sub>4</sub>S [M]<sup>+</sup>, requires  $m/z$ : 481.2035, found  $m/z$ : 481.2035.

### CFAAC of **5a** with Benzyl Azide

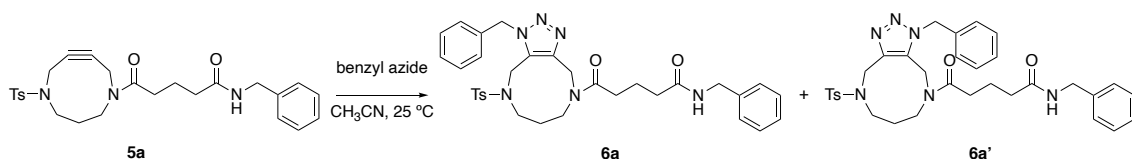

To a solution of **5a** (63.0 mg, 0.131 mmol) in  $\text{CH}_3\text{CN}$  (6 mL) was added benzyl azide (1.63  $\mu\text{L}$ , 0.131 mmol) at  $25^\circ\text{C}$ . After the mixture had been stirred at that temperature for 48 h, the reaction mixture was concentrated under reduced pressure. The residue was purified by preparative TLC ( $\text{CHCl}_3/\text{MeOH} = 20:1$ ) to afford 39.6 mg (49%, 1<sup>st</sup> eluent) of **6a'** and 38.9 mg (48%, 2<sup>nd</sup> eluent) of **6a** as colorless crystals.

#### **6a**

$^1\text{H}$  NMR (300 MHz,  $\text{CDCl}_3$ , compound exists as a 80:20 mixture of rotational isomers):  $\delta$  7.54 (d,  $J = 8.2$  Hz, 0.4H), 7.12–7.41 (m, 13.6H), 6.26 (s, 1H), 5.68 (s, 0.4H), 5.50 (s, 1.6H), 4.75 (s, 0.4H), (s, 1.6H), 4.42–4.38 (m, 2H), 4.07 (s, 0.4H), 4.03 (s, 1.6H), 3.55 (t,  $J = 4.7$  Hz, 1.6H), 3.24–3.18 (m, 0.4H), 3.08–2.97 (m, 0.4H), 2.93 (t,  $J = 5.9$  Hz, 1.6H), 2.56 (t,  $J = 7.0$  Hz, 1.6H), 2.44 (s, 3H), 2.31–2.19 (m, 2.4H), 1.81–1.94 (m, 4H).

$^{13}\text{C}$  NMR (75 MHz,  $\text{CDCl}_3$ , major isomer):  $\delta$  173.62, 172.56, 144.44, 143.53, 138.55, 134.08, 133.57, 130.51, 130.06, 129.25, 128.66, 127.88, 127.38, 127.22, 52.48, 48.19, 48.05, 46.82, 43.51, 42.41, 35.86, 32.93, 27.95, 21.65, 21.31. (2 aromatic carbons were overlapping)

IR (reflection): 3301, 2931, 1955, 1639, 1539, 1496, 1340, 1160  $\text{cm}^{-1}$ .

mp: 64.0–64.5  $^\circ\text{C}$ .

HRMS (EI, positive): Exact mass calc. for  $\text{C}_{33}\text{H}_{38}\text{N}_6\text{O}_4\text{S}$   $[\text{M}]^+$ , requires  $m/z$ : 614.2675, found  $m/z$ : 614.2676.

#### **6a'**

$^1\text{H}$  NMR (300 MHz,  $\text{CDCl}_3$ , compound exists as a 94:6 mixture of rotational isomers):  $\delta$  7.69 (d,  $J = 8.0$  Hz, 2H), 7.37–7.12 (m, 12H), 6.44 (t,  $J = 5.6$  Hz, 0.6H), 6.13 (d,  $J = 5.3$  Hz, 0.94H), 5.90 (s, 1.88H), 5.51 (s, 0.12H), 4.57 (s, 1.88H), 4.40–4.30 (m, 4.12H), 3.46–3.21 (m, 2H), 2.98–2.87 (m, 2H), 2.45 (s, 3H), 2.33–2.24 (m, 3.88H), 1.99–1.89 (m, 4.12H).

$^{13}\text{C}$  NMR (75 MHz,  $\text{CDCl}_3$ , major isomer):  $\delta$  173.10, 172.34, 144.43, 142.30, 138.35, 135.79, 132.63, 130.92, 130.06, 128.93, 128.74, 128.19, 127.88, 127.76, 127.54, 127.18, 52.24, 47.67, 47.35, 43.58, 41.26, 35.36, 32.42, 30.01, 21.66, 21.04. (1 aliphatic carbon was overlapping)

IR (reflection): 3304, 2928, 1956, 1640, 1542, 1340, 1159  $\text{cm}^{-1}$ .

mp: 66.6–67.3  $^\circ\text{C}$ .

HRMS (EI, positive): Exact mass calc. for  $\text{C}_{33}\text{H}_{38}\text{N}_6\text{O}_4\text{S}$   $[\text{M}]^+$ , requires  $m/z$ : 614.2675, found  $m/z$ : 614.2676.

### Amidation and CFAAC of **1a** in Simultaneous Mixing

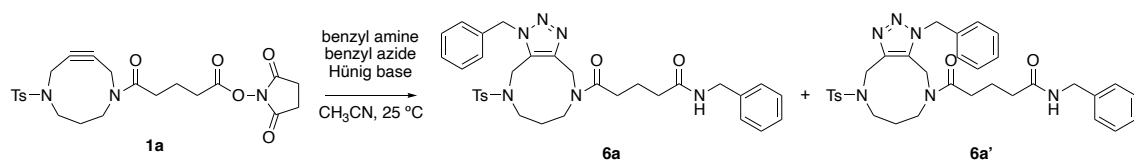

To a solution of **1a** (30.0 mg, 0.0613 mmol) in  $\text{CH}_3\text{CN}$  (3 mL) were added benzyl azide (7.63  $\mu\text{L}$ , 0.0613 mmol), benzyl amine (6.70  $\mu\text{L}$ , 0.0613 mmol) and Hünig base (10.6  $\mu\text{L}$ , 0.0623 mmol) at  $25^\circ\text{C}$ . After the mixture had been stirred at that temperature for 48 h, the reaction was quenched with  $\text{H}_2\text{O}$  and extracted three times with  $\text{AcOEt}$ . The combined organic phase was dried over  $\text{Na}_2\text{SO}_4$ , filtered, and the solvent was removed under reduced pressure. The residue was purified by preparative TLC ( $\text{CHCl}_3/\text{MeOH} = 20:1$ ) to afford 17.9 mg (47%, 1<sup>st</sup> eluent) of **6a'** and 17.7 mg (47%, 2<sup>nd</sup> eluent) of **6a** as colorless crystals.

### Thia Michael Reaction of **2a** with *p*-Toluene Thiol

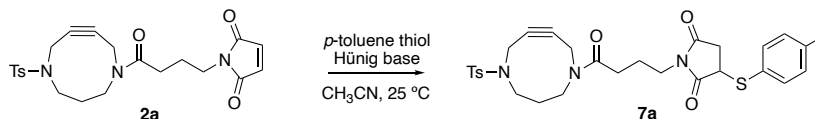

To a solution of **2a** (30.0 mg, 0.0676 mmol) in CH<sub>3</sub>CN (3 mL) was added *p*-toluene thiol (8.40 mg, 0.0676 mmol) and Hünig base (9.20  $\mu$ L, 0.0541 mmol) at 25 °C in the shade. After the mixture had been stirred at that temperature for 12 h, the solvent was removed under reduced pressure. The residue was purified by preparative TLC (CHCl<sub>3</sub>) to afford 38.0 mg (99%) of **7a** as colorless crystals.

<sup>1</sup>H NMR (300 MHz, CDCl<sub>3</sub>, compound exists as a 62.5:37.5 mixture of rotational isomers):  $\delta$  7.65 (d,  $J$  = 8.2 Hz, 2H), 7.40-7.31 (m, 4H), 7.12 (d,  $J$  = 8.2 Hz, 2H), 4.27-4.10 (m, 1.25H), 3.96-3.76 (m, 3.75H), 3.56-3.43 (m, 4H), 3.26-3.03 (m, 3H), 2.66 (ddd,  $J$  = 18.8, 3.8, 3.8 Hz, 1H), 2.43 (s, 1.88H), 2.42 (s, 0.625H), 2.32 (s, 3H), 2.23-1.73 (m, 6H).

<sup>13</sup>C NMR (75 MHz, CDCl<sub>3</sub>):  $\delta$  175.85, 175.81, 174.81, 172.10, 170.98, 143.98, 143.85, 139.86, 139.79, 134.95, 134.78, 134.55, 130.23, 130.00, 129.96, 127.39, 127.35, 126.69, 126.52, 89.42, 88.49, 88.46, 86.67, 45.28, 44.21, 44.18, 43.72, 43.64, 41.02, 40.79, 39.38, 38.68, 38.59, 36.65, 36.15, 36.07, 32.15, 31.08, 30.96, 30.12, 29.75, 23.02, 22.84, 21.62, 21.30. (1 carbonyl, 2 aromatic and 2 aliphatic carbons were overlapping)

IR (reflection): 2924, 1704, 1645, 1335, 1159, 814, 712, 668 cm<sup>-1</sup>.

mp: 55.6-57.0 °C.

HRMS (EI, positive): Exact mass calc. for C<sub>29</sub>H<sub>33</sub>N<sub>3</sub>O<sub>5</sub>S<sub>2</sub> [M]<sup>+</sup>, requires  $m/z$ : 567.1862, found  $m/z$ : 567.1858.

### CFAAC of **7a** with Benzyl Azide

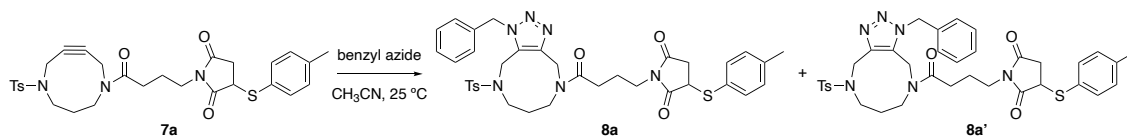

To a solution of **1ab** (43.6 mg, 0.0768 mmol) was added benzyl azide (9.55  $\mu\text{L}$ , 0.0768 mmol) in  $\text{CH}_3\text{CN}$  (5 mL) at  $25^\circ\text{C}$ . After the mixture had been stirred at that temperature for 48 h, the solvent was removed under reduced pressure. The residue was purified by preparative TLC ( $\text{CHCl}_3/\text{MeOH} = 40:1$ ) to afford 24.8 mg (46%, 1<sup>st</sup> eluent) of **8a'** and 22.3 mg (42%, 2<sup>nd</sup> eluent) of **8a** as colorless crystals.

#### **8a**

$^1\text{H}$  NMR (300 MHz,  $\text{CDCl}_3$ , trace amount of rotational isomer was observed):  $\delta$  7.41-7.09 (m, 13H), 5.52 (d,  $J = 16.0$  Hz, 1H), 5.43 (d,  $J = 16.0$  Hz, 1H), 4.68 (d,  $J = 16.4$  Hz, 1H), 4.62 (d,  $J = 16.4$  Hz, 1H), 4.12-4.07 (m, 1H), 4.04 (d,  $J = 16.4$  Hz, 1H), 3.98 (d,  $J = 16.4$  Hz, 1H), 3.70 (ddd,  $J = 9.5, 4.7, 4.7$  Hz, 1H), 3.57-3.46 (m, 1H), 3.43-3.36 (m, 2H), 3.26-3.17 (m, 1H), 3.05-2.89 (ddd, m, 2H), 2.58 (dd,  $J = 18.5, 3.8$  Hz, 1H), 2.44 (s, 3H), 2.31 (s, 3H), 1.90-1.67 (m, 4H).

$^{13}\text{C}$  NMR (75 MHz,  $\text{CDCl}_3$ ):  $\delta$  176.09, 175.11, 172.82, 144.34, 143.35, 139.56, 134.63, 133.89, 133.20, 130.88, 130.10, 129.98, 129.23, 129.12, 127.45, 127.25, 126.71, 52.53, 48.75, 47.85, 46.99, 44.14, 42.80, 38.23, 36.02, 30.60, 27.95, 22.63, 21.61, 21.21.

IR (reflection): 3463, 2928, 1776, 1643, 1597, 1493, 1439, 1234, 1159, 1121  $\text{cm}^{-1}$ .

mp:  $65.1\text{--}66.0^\circ\text{C}$ .

HRMS (EI, positive): Exact mass calc. for  $\text{C}_{36}\text{H}_{40}\text{N}_6\text{O}_5\text{S}_s$   $[\text{M}]^+$ , requires  $m/z$ : 700.2502, found  $m/z$ : 700.2500.

#### **8a'**

$^1\text{H}$  NMR (300 MHz,  $\text{CDCl}_3$ , trace amount of rotational isomer was observed):  $\delta$  7.73 (d,  $J = 8.2$  Hz, 2H), 7.49-7.10 (m, 11H), 5.97 (s, 2H), 4.51 (s, 2H), 4.42 (s, 2H), 3.65 (dd,  $J = 9.4, 4.1$  Hz, 1H), 3.52 (ddd,  $J = 5.4, 5.4, 5.4$  Hz, 2H), 3.44-3.40 (m, 2H), 3.09-2.97 (m, 2H), 2.82 (dd,  $J = 18.8, 9.4$  Hz, 1H), 2.52 (dd,  $J = 18.8, 4.1$  Hz, 1H), 2.47 (s, 3H), 2.30 (s, 3H), 2.21 (m, 2H), 1.97-1.95 (m, 2H), 1.88-1.82 (m, 2H).

$^{13}\text{C}$  NMR (75 MHz,  $\text{CDCl}_3$ ):  $\delta$  175.96, 174.94, 172.40, 144.47, 142.26, 139.69, 135.82, 134.76, 132.51, 131.33, 130.19, 130.11, 129.04, 128.23, 127.91, 127.07, 126.75, 52.36, 48.19, 47.78, 46.83, 43.98, 42.35, 38.77, 36.01, 31.31, 29.42, 22.55, 21.71, 21.30.

IR (reflection): 3464, 2925, 1775, 1642, 1597, 1493, 1340, 1159, 1090  $\text{cm}^{-1}$ .

mp:  $65.4\text{--}66.2^\circ\text{C}$ .

HRMS (EI, positive): Exact mass calc. for  $\text{C}_{36}\text{H}_{40}\text{N}_6\text{O}_5\text{S}_s$   $[\text{M}]^+$ , requires  $m/z$ : 700.2502, found  $m/z$ : 700.2501.

### Thia Michael Reaction and CFAAC of **2a** in Simultaneous Mixing

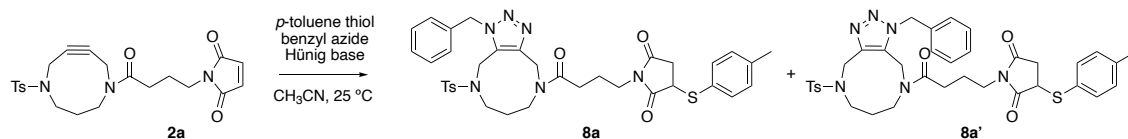

To a solution of **2a** (30.0 mg, 0.0676 mmol) in  $\text{CH}_3\text{CN}$  (3 mL) was added benzyl azide (8.41  $\mu\text{L}$ , 0.0676 mmol), *p*-toluene thiol (8.40 mg, 0.0676 mmol) and Hünig base (9.19  $\mu\text{L}$ , 0.0540 mmol) at  $25^\circ\text{C}$  in the shade. After the mixture had been stirred at that temperature for 48 h, the solvent was removed under reduced pressure. The residue was purified by preparative TLC ( $\text{CHCl}_3/\text{MeOH} = 40:1$ ) to afford 22.0 mg (46%, 1<sup>st</sup> eluent) of **8a'** and 22.3 mg (47%, 2<sup>nd</sup> eluent) of **8a** as colorless crystals.



## Structure Determination of Regioisomers of Huisgen Reaction

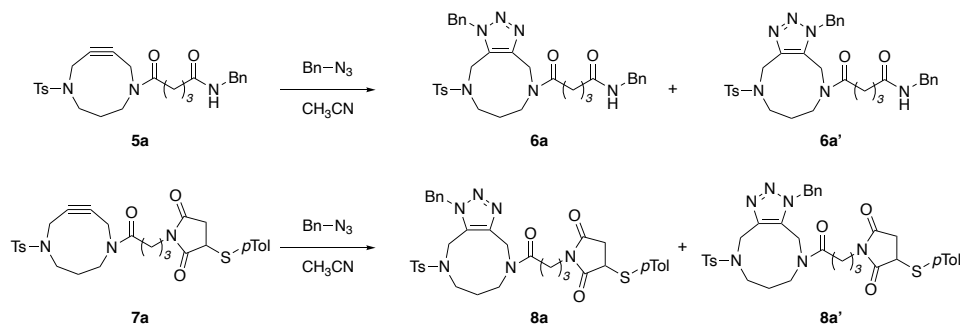

The structure of Huisgen reaction product **6a**, **6a'**, **8a** and **8a'** were determined by the comparison with authentic samples prepared as follows. Huisgen reaction products of *NTs*, *NNs*-DACN with benzyl azide (**s1** and **s1'**) were separated by silicagel column chromatography, and the *Ns* group of **s1'** was removed by treatment with *p*-tolSH and  $\text{Cs}_2\text{CO}_3$ . Thus obtained secondary amine derived from **s1'** was converted to HCl salt **s2'**, and the structure of **s2'** was determined by X-ray crystal analysis. Authentic samples of **6a'** and **8a'** were prepared from **s2'**.

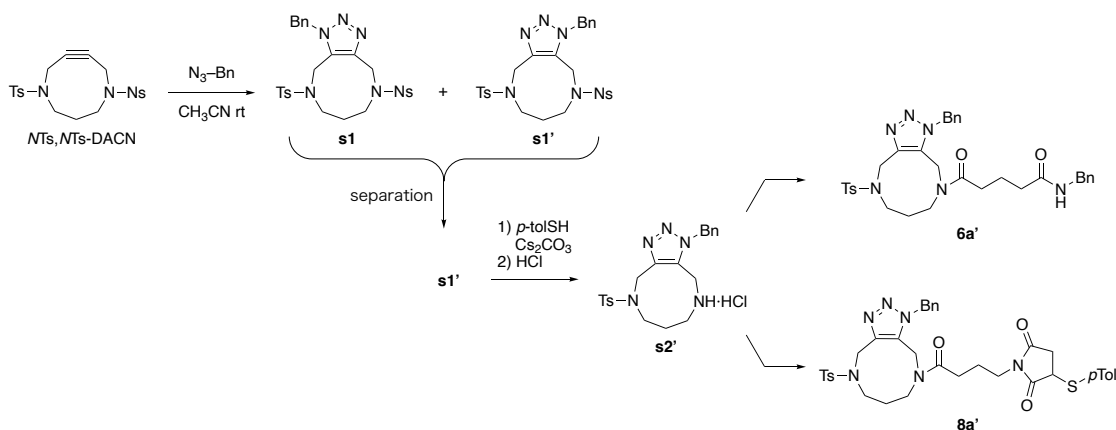

## X-ray crystal structure analysis of **s2'**

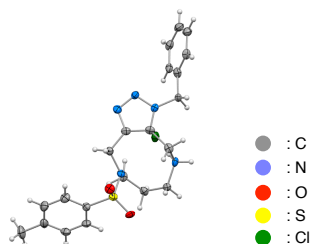

ORTEP Drawing of **s2'** (50% probability ellipsoids), selected crystal data: crystal system; monoclinic,  $P2_1/n$  (No. 14),  $a = 11.982(8) \text{ \AA}$ ,  $b = 5.795(4) \text{ \AA}$ ,  $c = 30.82(2) \text{ \AA}$ ,  $\alpha = 90^\circ$ ,  $\beta = 90^\circ$ ,  $\gamma = 90.514(15)^\circ$ ,  $V = 2140(2) \text{ \AA}^3$ ,  $T = 123\text{K}$ ,  $Z = 4$ ,  $Z' = 1$ ,  $\mu (\text{Mo K}\alpha) = 0.305$ , 17635 reflections measured, 3656 unique ( $R_{\text{int}} = 0.1966$ ) which were used in all calculations. The final  $wR_2$  was 0.2652 (all data) and  $R_1$  was 0.1095 ( $I \geq 2 \sigma(I)$ ).

CCDC Number: 2260285

## Huisgen Reaction of NTs,*N'*Ns-DACN with Benzyl Azide

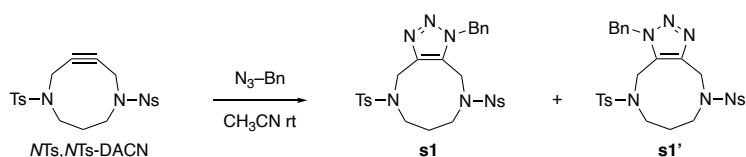

To a solution of NTs,*N'*Ns-DACN (156 mg, 0.336 mmol) was added benzyl azide (42.0  $\mu\text{L}$ , 0.336 mmol) in  $\text{CH}_3\text{CN}$  (3 mL) at ambient temperature. After the mixture had been stirred at that temperature for 8 h, the solvent was removed under reduced pressure. The residue was purified by silica gel chromatography ( $\text{CHCl}_3$ ) to afford 100 mg of first eluate **s1** (50%) and 88.6 mg of second eluate **s1'** (44%) as colorless crystals.

### **s1**

$^1\text{H}$  NMR (300 MHz,  $\text{CDCl}_3$ ):  $\delta$  7.93–7.89 (m, 1H), 7.78–7.61 (m, 6H), 7.33–7.22 (m, 6H), 5.72 (s, 2H), 4.76 (s, 2H), 4.47 (s, 2H), 3.41–3.37 (m, 2H), 3.00 (t,  $J = 5.7$  Hz, 2H), 2.43 (s, 3H), 1.92–1.85 (br, 2H).

$^{13}\text{C}$  NMR (100 MHz,  $\text{CDCl}_3$ ):  $\delta$  148.49, 144.41, 141.79, 134.77, 134.34, 134.01, 132.00, 131.38, 131.13, 130.78, 130.16, 129.11, 128.56, 127.31, 127.15, 124.39, 52.21, 48.90, 47.86, 46.37, 42.57, 30.05, 21.59.

IR (reflection): 2927, 1545, 1451, 1343, 1163, 899, 817, 750, 678,  $548\text{ cm}^{-1}$ .

mp: 94.8–95.5  $^\circ\text{C}$ .

HRMS (FAB, matrix; 3-nitrobenzyl alcohol, positive): Exact mass calc. for  $\text{C}_{27}\text{H}_{29}\text{N}_6\text{O}_6\text{S}_2$  [ $\text{M}+\text{H}$ ] $^+$ , requires  $m/z$ : 597.1590, found  $m/z$ : 597.1589.

### **s1'**

$^1\text{H}$  NMR (300 MHz,  $\text{CDCl}_3$ ):  $\delta$  8.00–7.99 (m, 1H), 7.75–7.71 (m, 2H), 7.55–7.52 (m, 1H), 7.55–7.52 (m, 2H), 7.36–7.21 (m, 7H), 5.73 (s, 2H), 4.68 (s, 2H), 4.29 (s, 2H), 3.30 (t,  $J = 5.7$  Hz, 2H), 3.24 (t,  $J = 5.7$  Hz, 2H), 2.43 (s, 3H), 1.85 (tt,  $J = 5.7, 5.7$  Hz, 2H).

$^{13}\text{C}$  NMR (100 MHz,  $\text{CDCl}_3$ ):  $\delta$  148.23, 144.34, 143.04, 134.81, 134.26, 133.29, 132.06, 131.73, 130.75, 130.04, 129.46, 129.00, 128.44, 127.52, 127.50, 124.52, 52.04, 48.64, 47.70, 47.61, 41.79, 29.73, 21.58.

IR (reflection): 2930, 1542, 1456, 1342, 1162, 902, 815, 741, 668,  $548\text{ cm}^{-1}$ .

mp: 63.9–64.2  $^\circ\text{C}$ .

HRMS (FAB, matrix; 3-nitrobenzyl alcohol, positive): Exact mass calc. for  $\text{C}_{27}\text{H}_{29}\text{N}_6\text{O}_6\text{S}_2$  [ $\text{M}+\text{H}$ ] $^+$ , requires  $m/z$ : 597.1590, found  $m/z$ : 597.1590.

### Remove of Ns Group of **s1'**

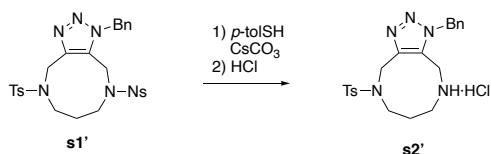

To a solution of **s1'** (1.24 g, 2.07 mmol) in CH<sub>3</sub>CN (20 mL) were added *p*-toluenethiol (334 mg, 2.69 mmol) and Cs<sub>2</sub>CO<sub>3</sub> (878 mg, 2.69 mmol) at ambient temperature. After the mixture had been stirred at that temperature for 10 h, the reaction was quenched with 1 M aq. HCl and washed five times with Et<sub>2</sub>O. The aqueous phase was neutralized with 1 M aq. NaOH and extracted three times with CH<sub>2</sub>Cl<sub>2</sub>. To the combined organic phase was added 35-37% aq. HCl (3 mL). After the mixture had been stirred at that temperature for 10 min, the solvent was removed under reduced pressure and the residual H<sub>2</sub>O was azeotroped with CH<sub>3</sub>CN. The resulting colorless precipitate was washed with AcOEt to afford 576 mg (62%) of **s2'** as colorless crystals.

<sup>1</sup>H NMR (600 MHz, DMSO-*d*<sub>6</sub>): δ 10.5-9.98 (br, 2H), 7.79 (d, *J* = 8.4 Hz, 2H), 7.46 (d, *J* = 8.4 Hz, 2H), 7.42-7.32 (m, 3H), 7.26 (m, 2H), 5.93 (s, 2H), 4.56 (s, 2H), 4.41 (s, 2H), 3.31 (t, *J* = 6.0 Hz, 2H), 2.98-2.82 (br, 2H), 2.09-1.97 (m, 2H).

<sup>13</sup>C NMR (150 MHz, DMSO-*d*<sub>6</sub>): δ 145.30, 143.83, 135.33, 134.63, 130.06, 128.83, 128.16, 127.64, 127.16, 125.10, 51.76, 49.56, 47.01, 41.03, 35.03, 25.55, 21.00.

IR (reflection): 2704, 1457, 1345, 1163, 953, 816, 761, 714, 657, 551 cm<sup>-1</sup>.

mp: 214.4-215.1 °C.

HRMS (EI, positive): Exact mass calc. for C<sub>21</sub>H<sub>25</sub>N<sub>5</sub>O<sub>2</sub>S [M-HCl]<sup>+</sup>, requires *m/z*: 411.1729, found *m/z*: 411.1727.

### Synthesis of **6a'** from **s2'**

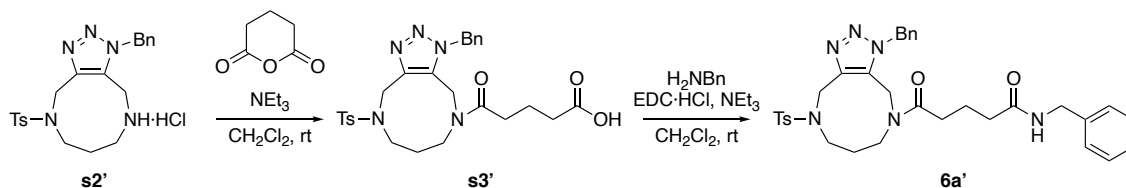

To a solution of **s2'** (10.0 mg, 0.0226 mmol) in  $\text{CH}_2\text{Cl}_2$  (2 mL) were added glutaric anhydride (2.60 mg, 0.0228 mmol) and  $\text{NEt}_3$  (15.7  $\mu\text{L}$ , 0.113 mmol) at ambient temperature. After the mixture had been stirred at that temperature for 20 h, benzyl amine (3.70  $\mu\text{L}$ , 0.339 mmol) and  $\text{EDC}\cdot\text{HCl}$  (7.00 mg, 0.0366 mmol) were added and stirred at that temperature for 10 h. The reaction was quenched with  $\text{H}_2\text{O}$  and extracted three times with  $\text{CH}_2\text{Cl}_2$ . The combined organic phases were washed with brine, dried over  $\text{Na}_2\text{SO}_4$ , filtered, and the filtrate was concentrated under reduced pressure. The residue was purified by preparative TLC ( $\text{CHCl}_3/\text{MeOH} = 20:1$ ) to afford 4.8 mg (33%) of **6a'** as colorless crystals.

### Synthesis of **8a'** from **s2'**

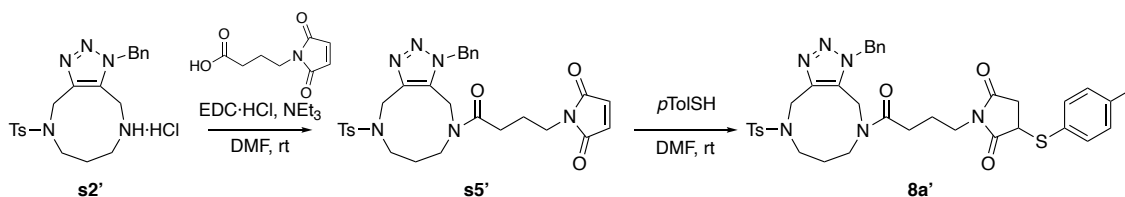

To a solution of **s2'** (10.0 mg, 0.0226 mmol) in DMF (3 mL) were added 4-maleimidobutyric acid (6.20 mg, 0.0339 mmol),  $\text{EDC}\cdot\text{HCl}$  (6.50 mg, 0.0339 mmol) and  $\text{NEt}_3$  (15.7  $\mu\text{L}$ , 0.113 mmol) at ambient temperature. After the mixture had been stirred at that temperature for 15 h, *p*-toluenethiol (8.40 mg, 0.0678 mmol) was added and stirred at that temperature for 3h. The reaction was quenched with  $\text{H}_2\text{O}$  and extracted three times with  $\text{CH}_2\text{Cl}_2$ . The combined organic phases were washed with brine, dried over  $\text{Na}_2\text{SO}_4$ , filtered, and the filtrate was concentrated under reduced pressure. The residue was purified by preparative TLC ( $\text{CHCl}_3/\text{MeOH} = 10:1$ ) to afford 7.1 mg (43%) of **8a'** as colorless crystals.

### Synthesis of Biotin NHS-ester

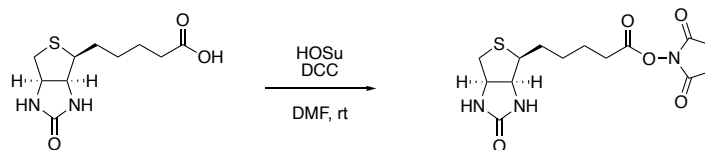

To a solution of biotin (200 mg, 0.820 mmol) in DMF (6 mL) were added *N*-hydroxysuccinimide (94.4 mg, 0.820 mmol) and DCC (220 mg, 1.07 mmol) at ambient temperature. After the mixture had been stirred at ambient temperature for 12 h, the reaction mixture was concentrated under reduced pressure. The residue was recrystallized from CHCl<sub>3</sub> (5 mL) / *i*PrOH (20 mL) to afford 186 mg (67%) of biotin NHS ester as white crystal.

The spectroscopic data were in good agreement with the reported values.<sup>[2]</sup>

### Synthesis of Biotin-PEG<sub>3</sub>-N<sub>3</sub> **10**

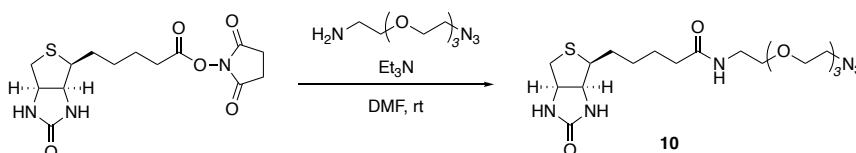

To a solution of NH<sub>3</sub>-PEG<sub>3</sub>-N<sub>3</sub> (7.0  $\mu$ L, 35  $\mu$ mol) in DMF (1 mL) were added Et<sub>3</sub>N (8.2  $\mu$ L, 59  $\mu$ mol) and biotin NHS ester (9.8 mg, 29  $\mu$ mol) at ambient temperature. After the mixture had been stirred at ambient temperature for 3 h, the reaction mixture was concentrated under reduced pressure. The residue was purified by silica-gel chromatography (acetone) to afford 10.2 mg (79%) of **10** as white crystal.

The spectroscopic data were in good agreement with the reported values.<sup>[3]</sup>

## Synthesis of 16

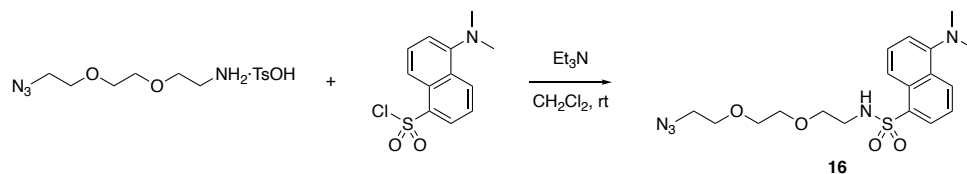

To a solution of azido-PEG<sub>2</sub>-amine·TsOH (87.0 mg, 0.251 mmol) in CH<sub>2</sub>Cl<sub>2</sub> (2.5 mL) were added dansyl chloride (56.4 mg, 0.209 mmol) and Et<sub>3</sub>N (117 μL, 0.841 mmol) at 0 °C. After the mixture had been stirred at ambient temperature for 2 h, the reaction was quenched with sat. aq. NH<sub>4</sub>Cl and extracted with CH<sub>2</sub>Cl<sub>2</sub>. The combined organic phases were washed with brine, dried over Na<sub>2</sub>SO<sub>4</sub>, filtered, and the filtrate was concentrated under reduced pressure. The residue was purified by silica-gel chromatography (hexane/AcOEt = 1:1) to afford 84.7 mg (99%) of **16** as green syrup.

<sup>1</sup>H NMR (300 MHz, CDCl<sub>3</sub>): δ 8.56 (d, *J* = 8.7 Hz, 1H), 8.32 (d, *J* = 8.9 Hz, 1H), 8.25 (dd, *J* = 7.3, 1.3 Hz, 1H), 7.63-7.45 (m, 2H), 7.21 (d, *J* = 8.1 Hz, 1H), 5.32 (t, *J* = 6.0 Hz, 1H), 3.61 (m, 2H), 3.52-3.44 (m, 2H), 3.43-3.31 (m, 6H), 3.16-3.04 (m, 2H), 2.90 (s, 6H).

<sup>13</sup>C NMR (75 MHz, CDCl<sub>3</sub>): δ 135.21, 130.53, 130.01, 129.85, 129.64, 128.47, 125.07, 123.47, 119.27, 115.45, 70.54, 70.45, 70.24, 69.47, 50.78, 45.66, 43.26, 29.89.

IR (neat): 3301, 2870, 2106, 1574, 1455, 1324, 1201, 1144, 943, 792 cm<sup>-1</sup>.

HRMS (FAB, matrix: 3-nitrobenzyl alcohol, positive): Exact mass calc. for C<sub>18</sub>H<sub>25</sub>N<sub>5</sub>O<sub>4</sub>S [M+H]<sup>+</sup>, requires *m/z*: 407.1627, found *m/z*: 407.1626.

### 3. Kinetic Study on CFAAC

CFAAC of **5a** and benzyl azide, **7a** and  $\text{BnN}_3$  were performed at 1:1 molar ratio in  $\text{CH}_3\text{CN}$  (5 mM) with 4-bromo anisole as an internal standard for reversed phase high performance liquid chromatography (HPLC) analysis. The reaction temperature was controlled to 25 °C in incubator. The process of the CFAAC was monitored by reversed phase HPLC analysis attached UV-detector ( $\lambda = 254 \text{ nm}$ ). Second order rate constants for the reactions were determined by plotting the  $1/[\text{BnN}_3]$  (vertical axis) versus reaction time (horizontal axis) by linear regression. All reactions were repeated in three times and the provided second order rate constants were averaged with standard error.

Reversed phase HPLC analysis were performed on a JASCO MD-2018 detectors equipped with a JASCO PU-2089 and a Shodex column oven AO-30 using Kanto Chemical Mightysil RP-18GP (4.6 mm  $\times$  250 mm, 5  $\mu\text{m}$ ).

Analytical conditions: 20% ammonium formate aq. /  $\text{CH}_3\text{CN} = 55 : 45$ , flow rate: 0.5 mL/min, detection: UV (220 nm), temp: 40 °C.

Retention time in CFAAC of **5a** and benzyl azide.

**5a** 12.8 min, **6a** or **6a'** 14.2 or 14.8 min, benzyl azide 18.5 min, 4-bromo anisole 23.9 min.

Retention time in CFAAC of **7a** and benzyl azide.

**7a** 28.0 min, **8a** or **8a'** 33.2 or 34.1 min, benzyl azide 18.0 min, 4-bromo anisole 23.0 min.

## CFAAC of 5a with Benzyl Azide

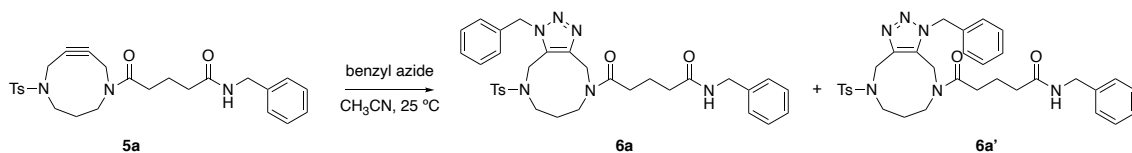

| batch 1                                                     |                                          |
|-------------------------------------------------------------|------------------------------------------|
| time (s)                                                    | 1/[BnN <sub>3</sub> ] (M <sup>-1</sup> ) |
| 3600                                                        | 243.2                                    |
| 7200                                                        | 257.6                                    |
| 14400                                                       | 278.3                                    |
| 18000                                                       | 291.6                                    |
| R <sup>2</sup> = 0.996                                      |                                          |
| y = 0.0033x + 232.42                                        |                                          |
| k = 3.33 x 10 <sup>-3</sup> M <sup>-1</sup> S <sup>-1</sup> |                                          |

| batch 2                                                     |                                          |
|-------------------------------------------------------------|------------------------------------------|
| time (s)                                                    | 1/[BnN <sub>3</sub> ] (M <sup>-1</sup> ) |
| 3600                                                        | 242.8                                    |
| 7200                                                        | 253.5                                    |
| 14400                                                       | 279.7                                    |
| 18000                                                       | 291.7                                    |
| R <sup>2</sup> = 0.999                                      |                                          |
| y = 0.0034x + 229.69                                        |                                          |
| k = 3.34 x 10 <sup>-3</sup> M <sup>-1</sup> S <sup>-1</sup> |                                          |

| batch 3                                                     |                                          |
|-------------------------------------------------------------|------------------------------------------|
| time (s)                                                    | 1/[BnN <sub>3</sub> ] (M <sup>-1</sup> ) |
| 3600                                                        | 243.1                                    |
| 7200                                                        | 257.7                                    |
| 14400                                                       | 282.7                                    |
| 18000                                                       | 295.9                                    |
| R <sup>2</sup> = 0.992                                      |                                          |
| y = 0.0036x + 230.69                                        |                                          |
| k = 3.36 x 10 <sup>-3</sup> M <sup>-1</sup> S <sup>-1</sup> |                                          |

average of  $k_{5a} = 3.35 \pm 0.10 \times 10^{-3} \text{ M}^{-1}\text{S}^{-1}$

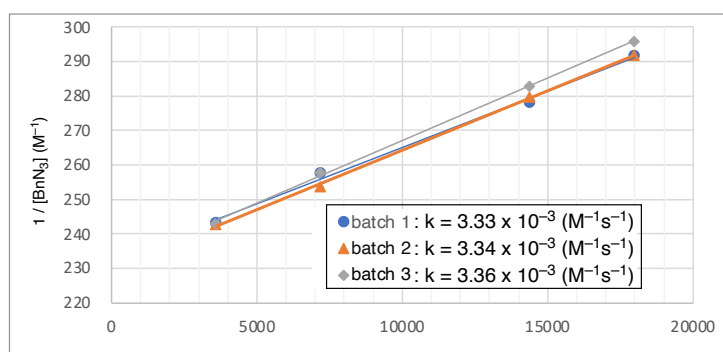



## CFAAC of 7a with Benzyl Azide

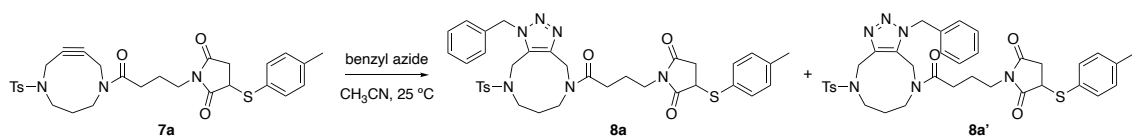

| batch 1                                               |                                            |
|-------------------------------------------------------|--------------------------------------------|
| time (s)                                              | $1/[\text{BnN}_3] \text{ (M}^{-1}\text{)}$ |
| 7200                                                  | 257.4                                      |
| 14400                                                 | 281.7                                      |
| 21600                                                 | 300.3                                      |
| 28800                                                 | 327.0                                      |
| 36000                                                 | 350.8                                      |
| $R^2 = 0.998$                                         |                                            |
| $y = 0.0032x + 233.8$                                 |                                            |
| $k = 3.20 \times 10^{-3} \text{ M}^{-1}\text{S}^{-1}$ |                                            |

| batch 2                                               |                                            |
|-------------------------------------------------------|--------------------------------------------|
| time (s)                                              | $1/[\text{BnN}_3] \text{ (M}^{-1}\text{)}$ |
| 7200                                                  | 262.3                                      |
| 14400                                                 | 287.9                                      |
| 21600                                                 | 306.3                                      |
| 28800                                                 | 341.7                                      |
| 36000                                                 | 352.1                                      |
| $R^2 = 0.981$                                         |                                            |
| $y = 0.0032x + 240.05$                                |                                            |
| $k = 3.20 \times 10^{-3} \text{ M}^{-1}\text{S}^{-1}$ |                                            |

| batch 3                                               |                                            |
|-------------------------------------------------------|--------------------------------------------|
| time (s)                                              | $1/[\text{BnN}_3] \text{ (M}^{-1}\text{)}$ |
| 7200                                                  | 247.6                                      |
| 14400                                                 | 270.5                                      |
| 21600                                                 | 293.7                                      |
| 28800                                                 | 318.7                                      |
| 36000                                                 | 335.1                                      |
| $R^2 = 0.996$                                         |                                            |
| $y = 0.0031x + 226.15$                                |                                            |
| $k = 3.10 \times 10^{-3} \text{ M}^{-1}\text{S}^{-1}$ |                                            |

average of  $k_{7a} = 3.17 \pm 0.06 \times 10^{-3} \text{ M}^{-1}\text{S}^{-1}$

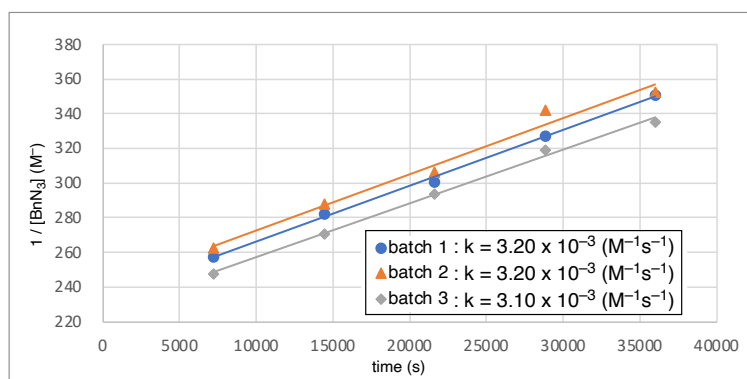

#### **4. LC-MS Analysis of Connection of Biomolecules**

LC-MS analysis were performed on an Advion expression CMS-L equipped with a JASCO MD-4010 detectors, a JASCO PU-4180, and a JASCO column oven LCO-035 using Kanto Chemical Mightysil RP-18GP (4.6 mm × 250 mm, 5 μm).

Preparative reversed phase HPLC were performed on a JASCO MD-2018 detectors equipped with a JASCO PU-2089, and a Shodex column oven AO-30 using Kanto Chemical Mightysil RP-18GP (250 mm × 10 mm, 5 μm).

MS conditions: ESI-positive, capillary temperature: 200 °C, capillary voltage: 160 V, source voltage offset: 30 V, source voltage span: 5 V, gas temperature: 250 °C, ESI voltage: 3500 V. Weights to two decimal places were measured using Sartorius MC5.

### Connection of **9** with **10** using **1b**

To avoid oxidation peptide the solvent was used after degassing by Ar bubbling.

To a solution of physalaemin (**9**) (2.29 mg, 1.81  $\mu\text{mol}$ ) in phosphate buffer (pH = 7.4, 500  $\mu\text{L}$ ) was added NMs-DACN NHS ester **1b** ( $4.96 \times 10^{-2}$  M in  $\text{CH}_3\text{CN}$ , 54.7  $\mu\text{L}$ , 2.72  $\mu\text{mol}$ ) at 25  $^\circ\text{C}$  and stirred at that temperature for 2 h. After confirmation of consumption of all of **9** and generation of **10** was monitored by LC-MS analysis, **10** ( $4.52 \times 10^{-2}$  M in  $\text{CH}_3\text{CN}$ , 100  $\mu\text{L}$ , 4.53  $\mu\text{mol}$ ) was added to the mixture and stirred at that temperature for 24 h. Consumption of all of **11** and generation of **12** was confirmed by LC-MS analysis. Purification of the reaction mixture by reverse-phase HPLC and freezing-dry afforded 2.22 mg (61%) of **12** as a white amorphous.

Analytical HPLC conditions: eluent: 1.0 mM formic acid aq./ $\text{CH}_3\text{CN}$  = 75:25 to 25:75 over 60 min., flow rate: 0.5 mL/min, detection: UV (220 nm) temp: 40  $^\circ\text{C}$ .

Preparative HPLC conditions: eluent: 5 mM formic acid aq./ $\text{CH}_3\text{CN}$  = 7:3, flow rate: 1.0 mL/min, detection: UV (220 nm) temp: 40  $^\circ\text{C}$ .

### HPLC chart of **9**, **1b**, *N*-hydroxysuccinimide and **11**

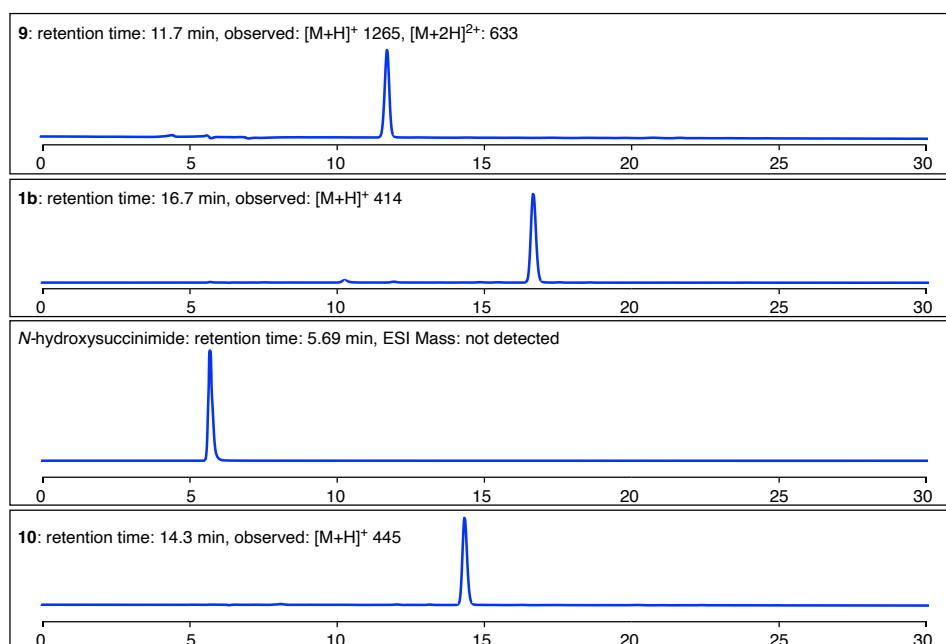

## HPLC Analysis of Reaction Progress

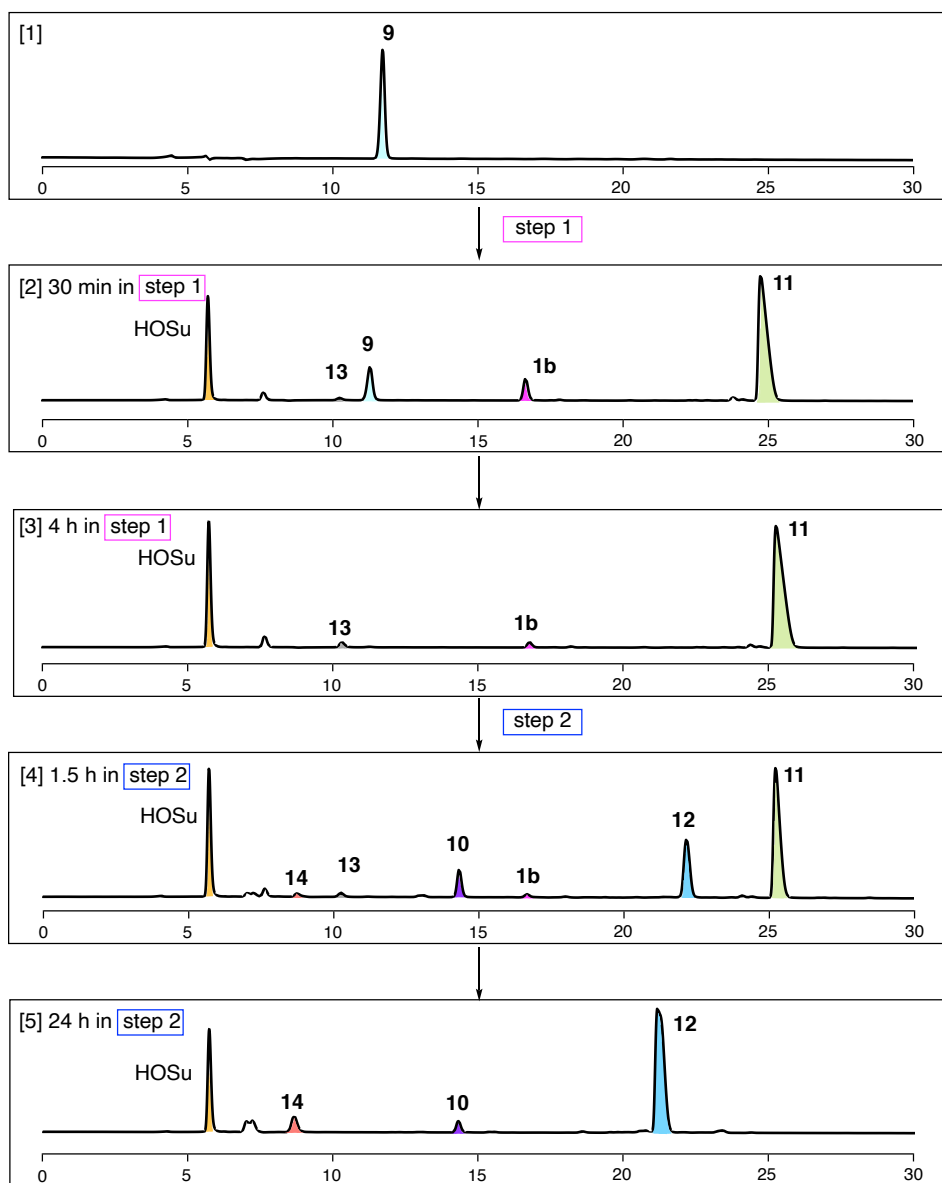

### HPLC Chart of 12 after Purification by Preparative Reverse-Phase HPLC

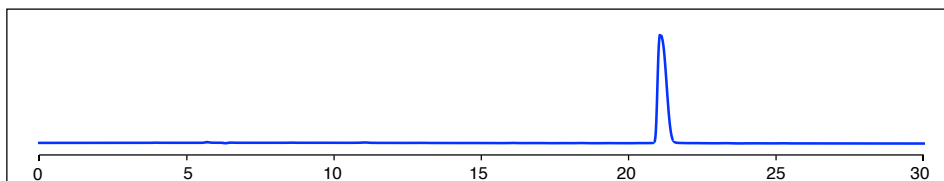

#### Retention Time and Observed Mass

**9:** retention time; 11.7 min,  $m/z$  1265  $[M+H]^+$ , 633  $[M+2H]^{2+}$ .

HOSu: retention time; 5.73 min, not detected.

**13:** retention time; 10.3 min,  $m/z$  317  $[M+H]^+$ .

**1b:** retention time; 16.7 min,  $m/z$  414  $[M+H]^+$ .

**11:** retention time; 25.2 min,  $m/z$  1564  $[M+H]^+$ , 782  $[M+2H]^{2+}$ .

**14:** retention time; 8.66 min,  $m/z$  761  $[M+H]^+$ .

**10:** retention time; 14.3 min,  $m/z$  445  $[M+H]^+$ .

**12:** retention time; 21.2 min,  $m/z$  1005  $[M+2H]^{2+}$ .

## ESI-Mass Analysis

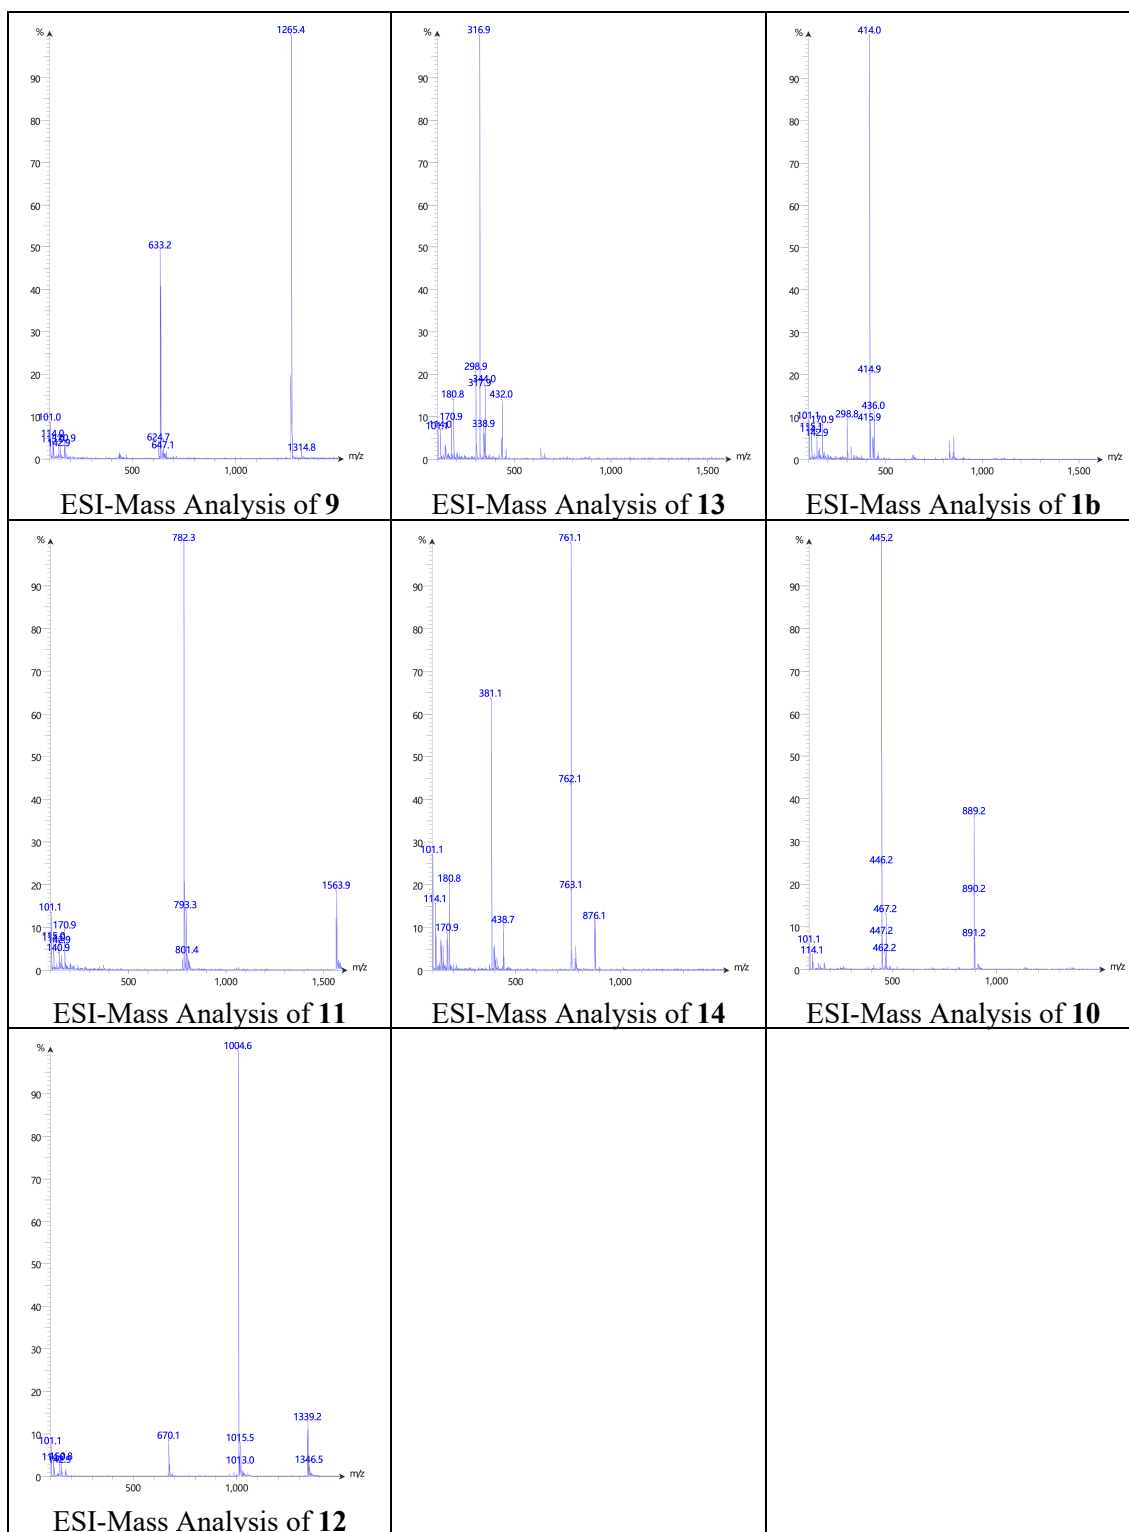

### Connection of **13** with **15** using **2b**.

To avoid oxidation of peptide, the solvent was used after degassing by Ar bubbling.

To a solution of peptide **15** (1.66 mg, 2.93  $\mu\text{mol}$ ) in  $\text{H}_2\text{O}$  (50  $\mu\text{L}$ )/ $\text{CH}_3\text{CN}$  (50  $\mu\text{L}$ ) was added NMs-DACN maleimide **2b** (1.09 mg, 2.98  $\mu\text{mol}$ ) at 25  $^\circ\text{C}$  and stirred at that temperature for 1.5 h. After confirmation of consumption of all of **15** and generation of **17** was monitored by LC-MS analysis, **16** ( $5.40 \times 10^{-2}$  M in  $\text{CH}_3\text{CN}$ , 81.3  $\mu\text{L}$ , 4.39  $\mu\text{mol}$ ) was added to the mixture and stirred at that temperature for 36 h. Consumption of all of **17** and generation of **18** was confirmed by LC-MS analysis. Purification of the reaction mixture by preparative reverse-phase HPLC and freezing-dry afforded 2.30 mg (59%) of **18** as a white amorphous.

Analytical HPLC conditions: eluent: 1.0 mM formic acid aq./ $\text{CH}_3\text{CN}$  = 90:10 to 10:90 over 60 min., flow rate: 0.5 mL/min, detection: UV (220 nm), temp: 40  $^\circ\text{C}$ .

Preparative HPLC conditions: eluent: 1.0 mM formic acid aq./ $\text{CH}_3\text{CN}$  = 8:2, flow rate: 1.0 mL/min, detection: UV (220 nm), temp: 40  $^\circ\text{C}$ .

### HPLC Chart of **15**, **2b** and **16**

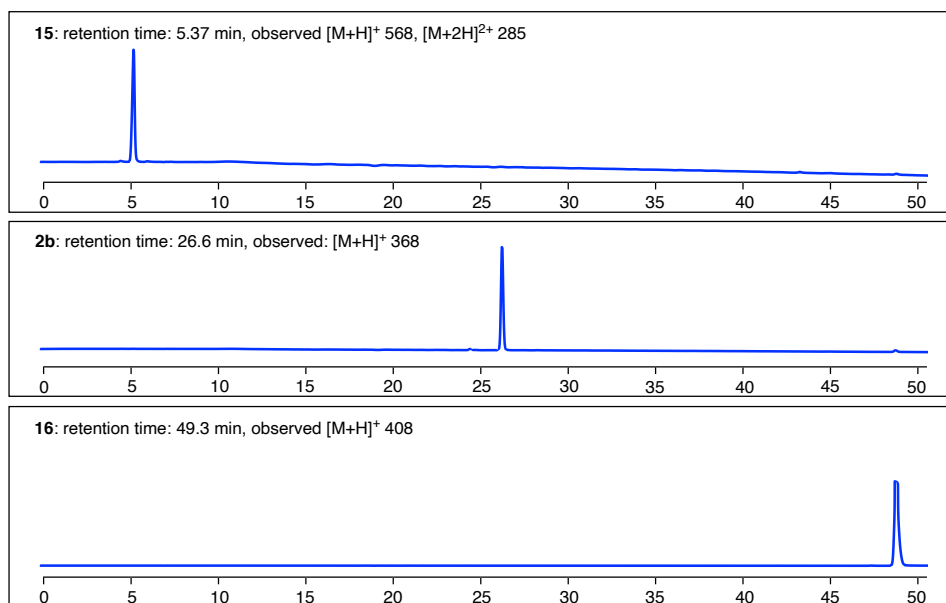

## HPLC Analysis of Reaction Progress

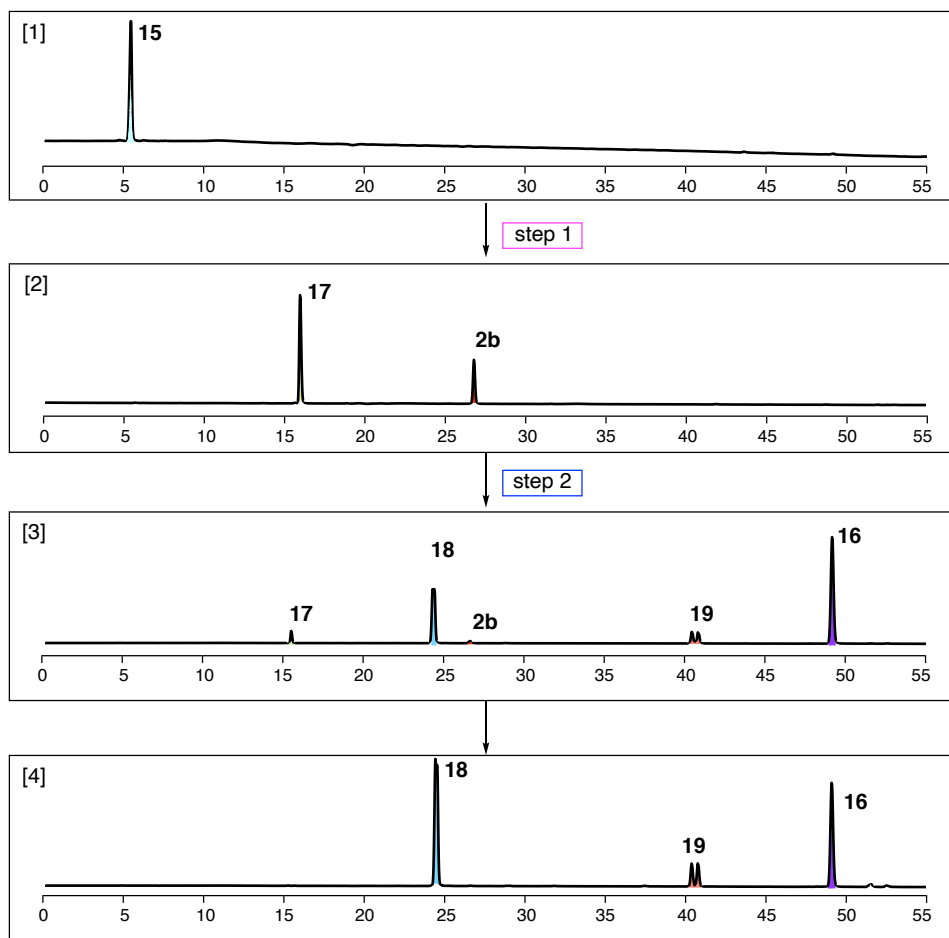

## HPLC Chart of 18 after Purification by Preparative Reverse-Phase HPLC

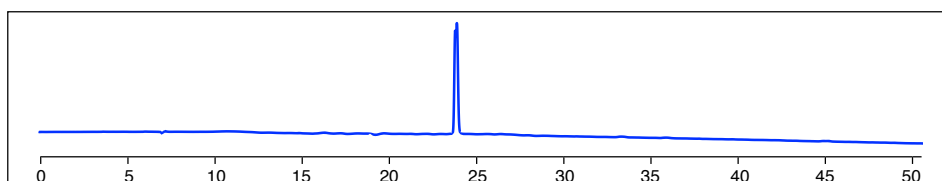

### Retention Time and Observed Mass

**15:** retention time; 5.37 min,  $m/z$  568  $[M+H]^+$ , 285  $[M+2H]^{2+}$ .

**17:** retention time; 15.9 min,  $m/z$  935  $[M+H]^+$ , 468  $[M+2H]^{2+}$ .

**2b:** retention time; 26.8 min,  $m/z$  368  $[M+H]^+$ .

**18:** retention time; 24.4 min,  $m/z$  1342  $[M+H]^+$ , 672  $[M+2H]^{2+}$ .

**19:** retention time; 40.4, 40.8 min,  $m/z$  775  $[M+H]^+$ , 388  $[M+2H]^{2+}$ .

**16:** retention time; 49.2 min,  $m/z$  408  $[M+H]^+$ .



## ESI-Mass Analysis

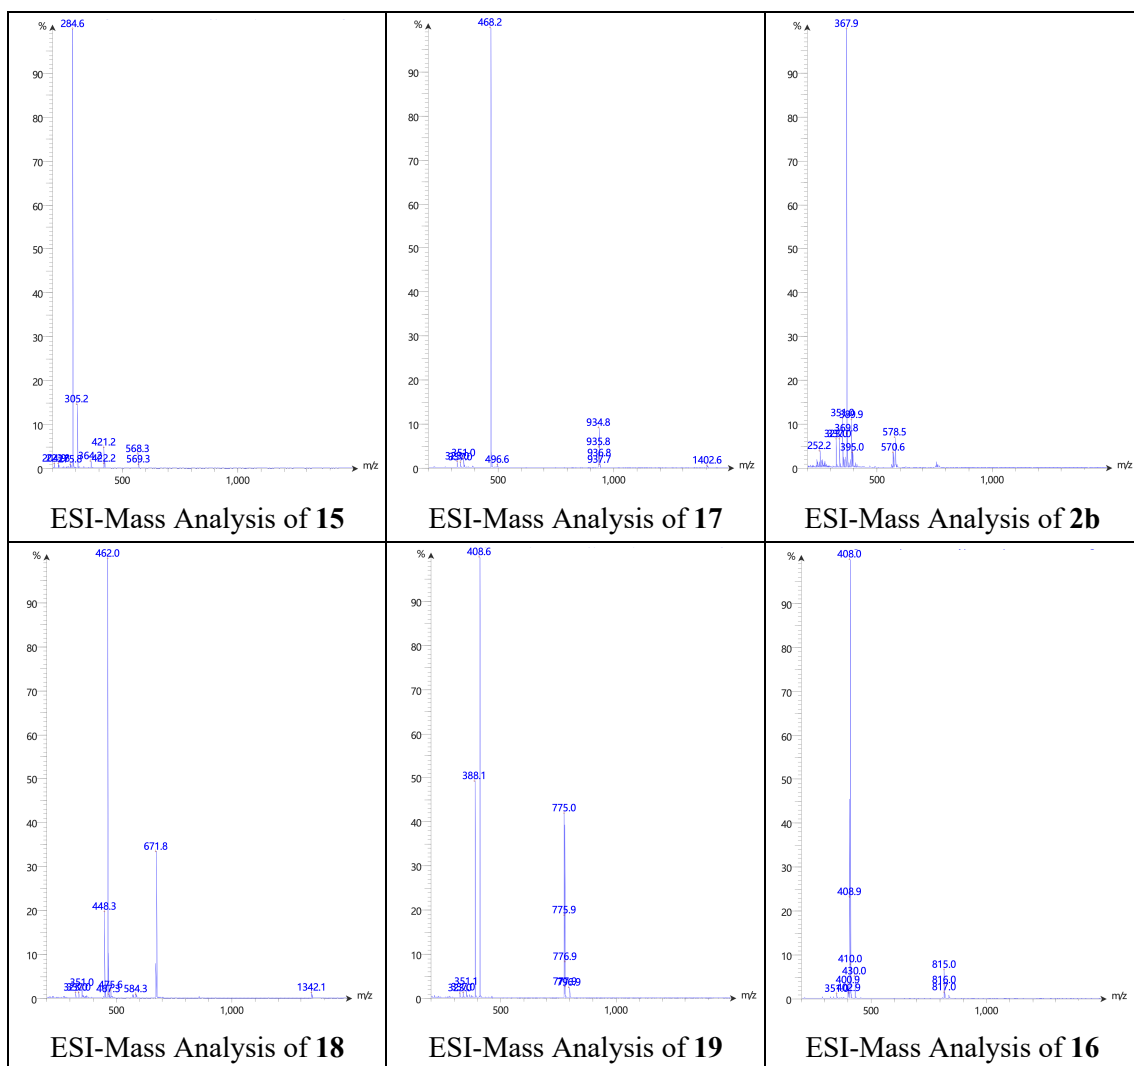

# **5 <sup>1</sup>H, <sup>13</sup>C NMR Spectra**

<sup>1</sup>H NMR Chart (300 MHz in CDCl<sub>3</sub>) of **1a**

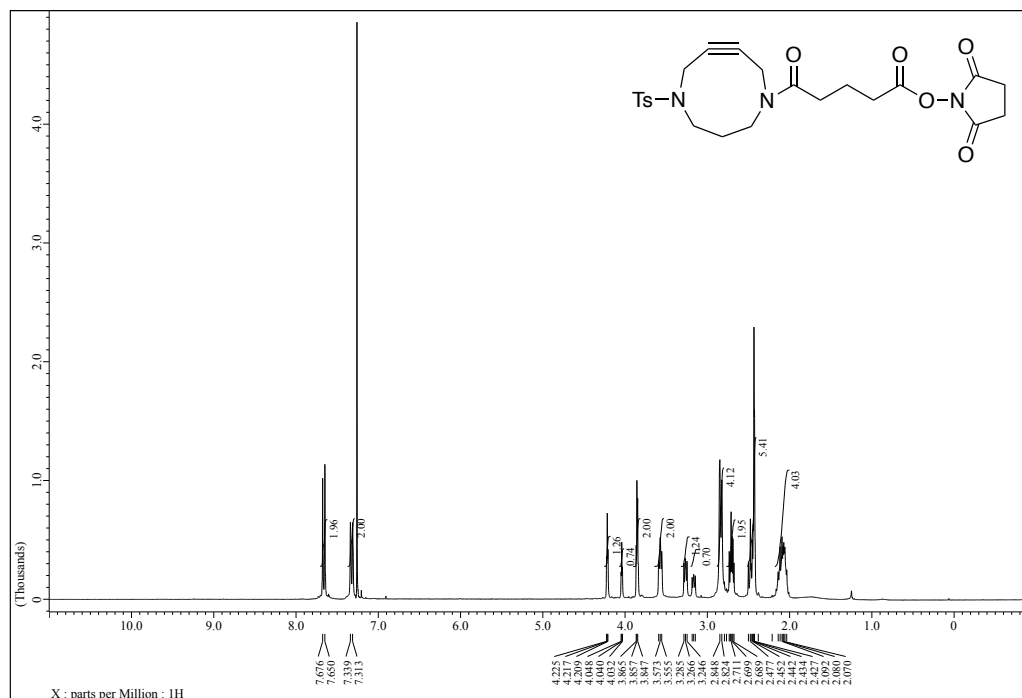

<sup>13</sup>C NMR Chart (125 MHz in CDCl<sub>3</sub>) of **1a**

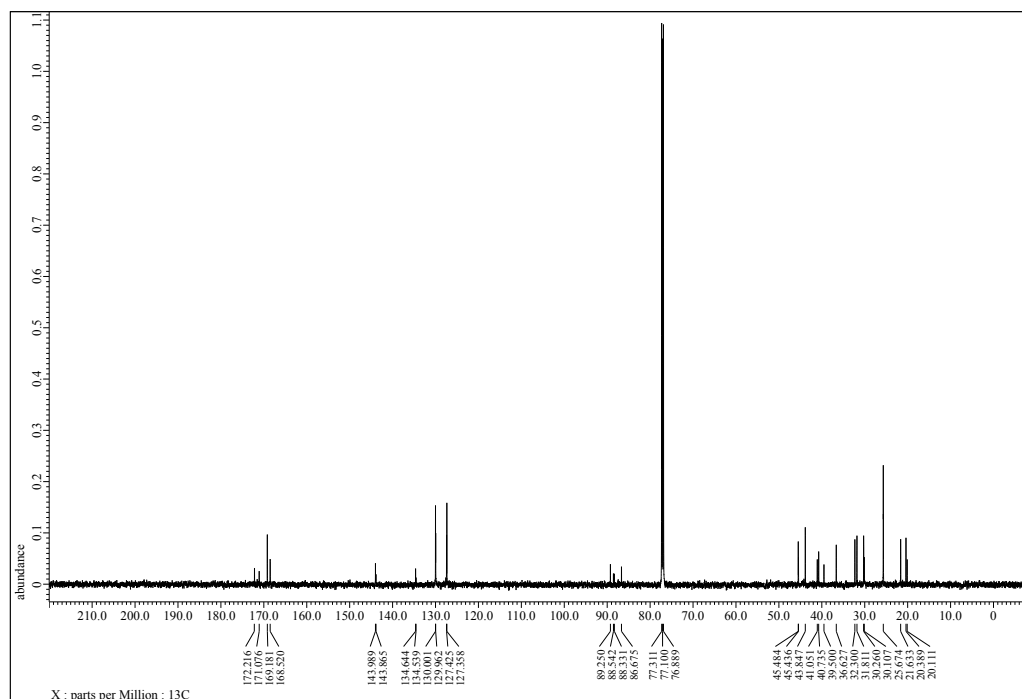

<sup>1</sup>H NMR Chart (300 MHz in CDCl<sub>3</sub>) of **1b**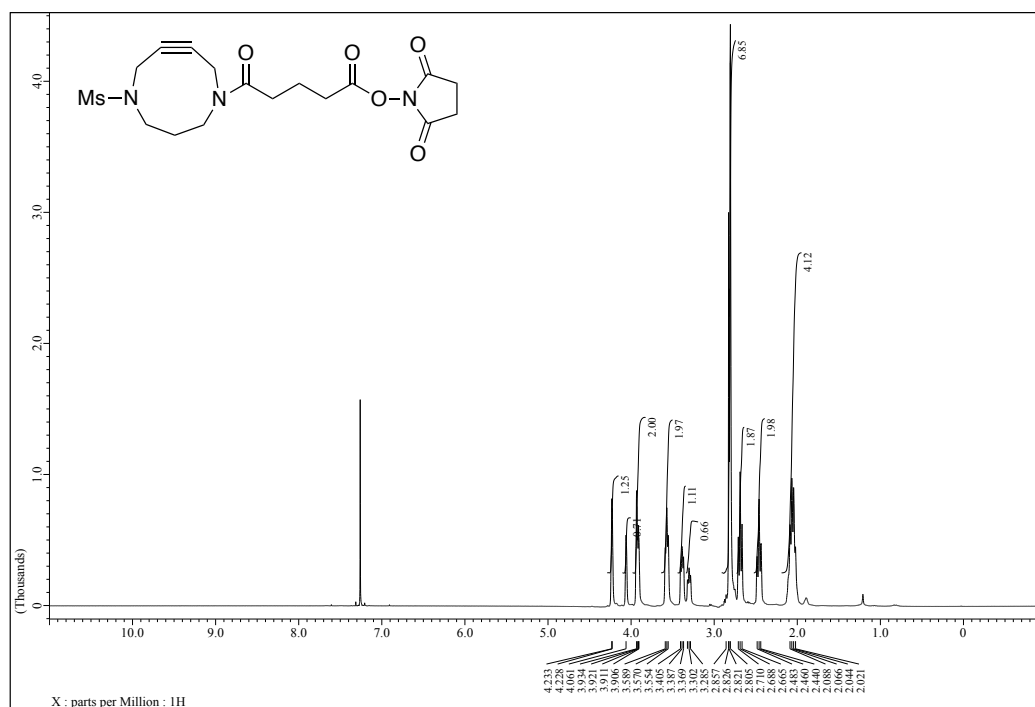

<sup>13</sup>C NMR Chart (100 MHz in CDCl<sub>3</sub>) of **1b**

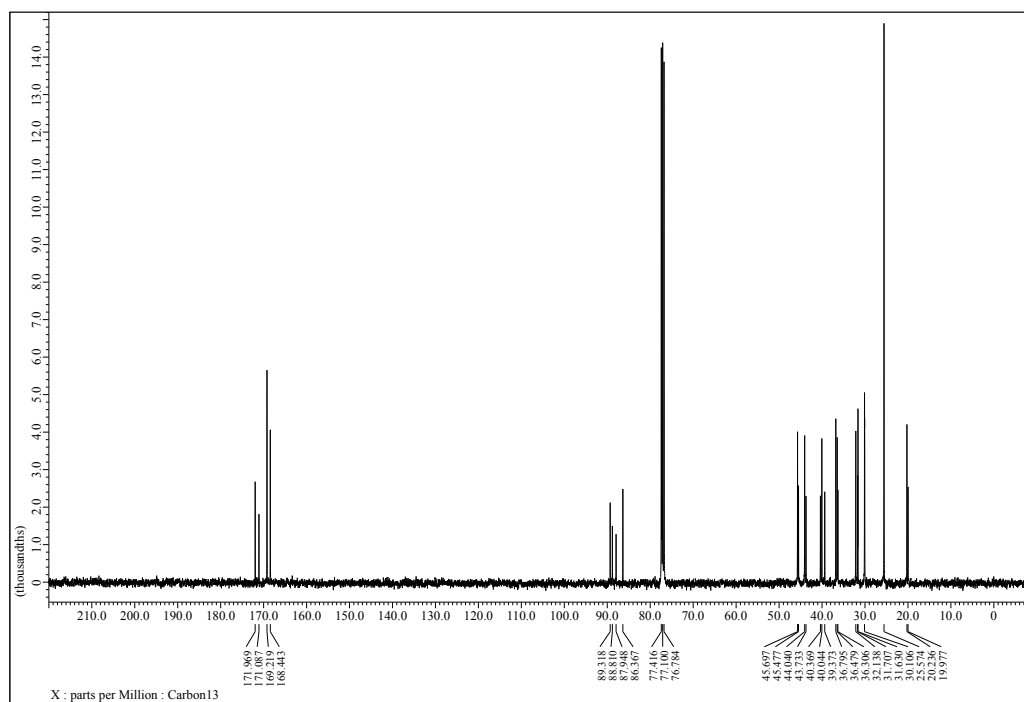

<sup>1</sup>H NMR Chart (300 MHz in DMSO-d<sub>6</sub>) of **2a**

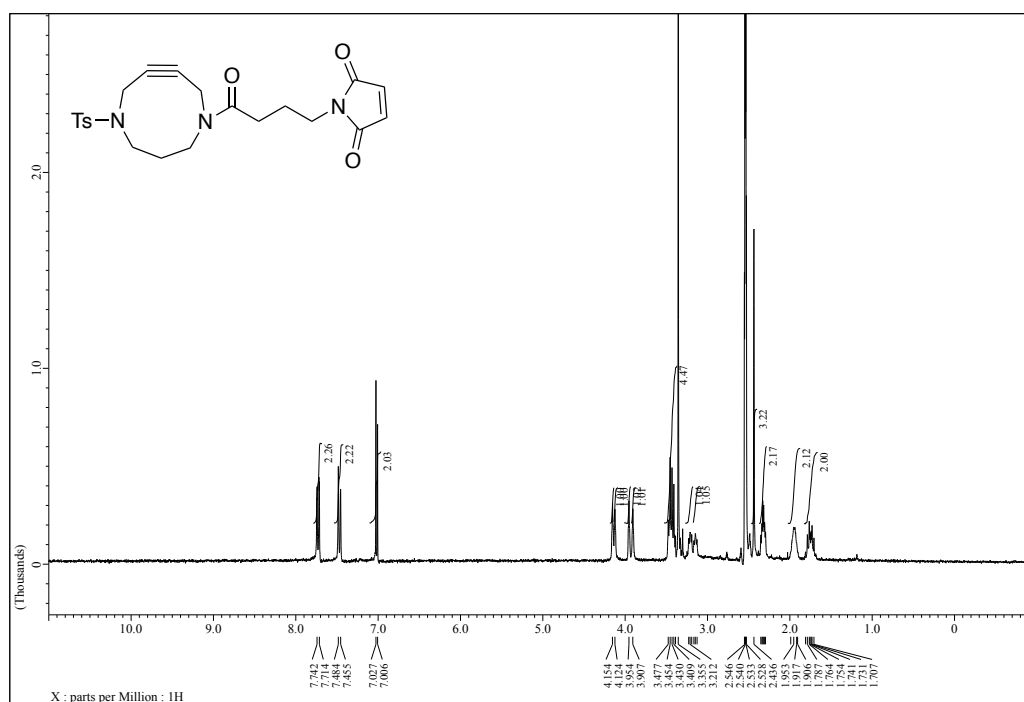

<sup>13</sup>C NMR Chart (75 MHz in DMSO-d<sub>6</sub>) of **2a**

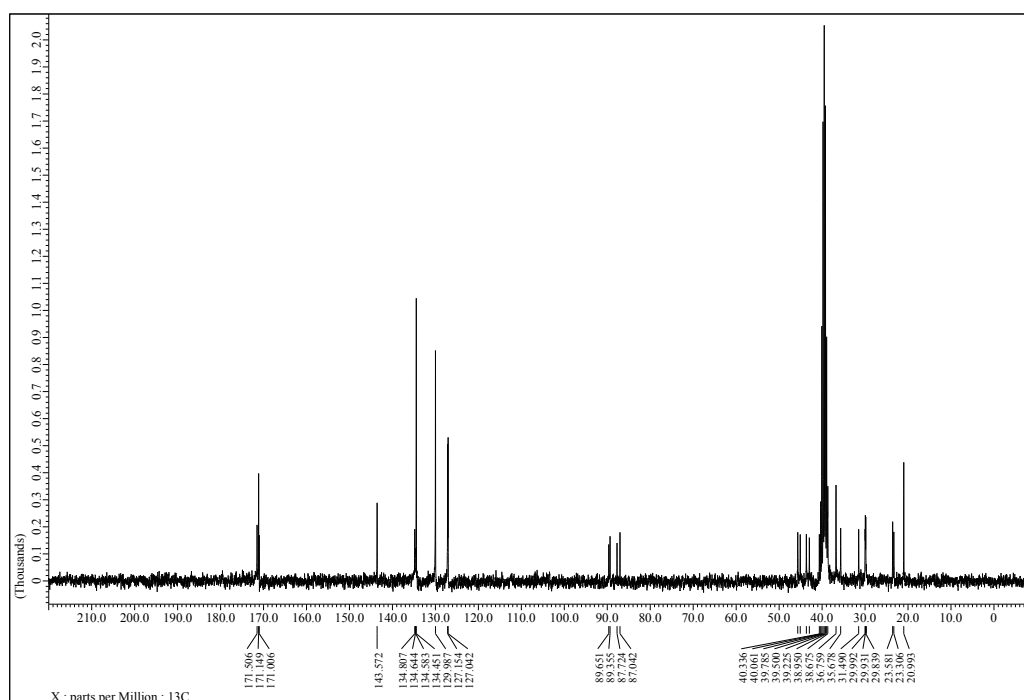

$^1\text{H}$  NMR Chart (300 MHz in  $\text{CDCl}_3$ ) of **2b**

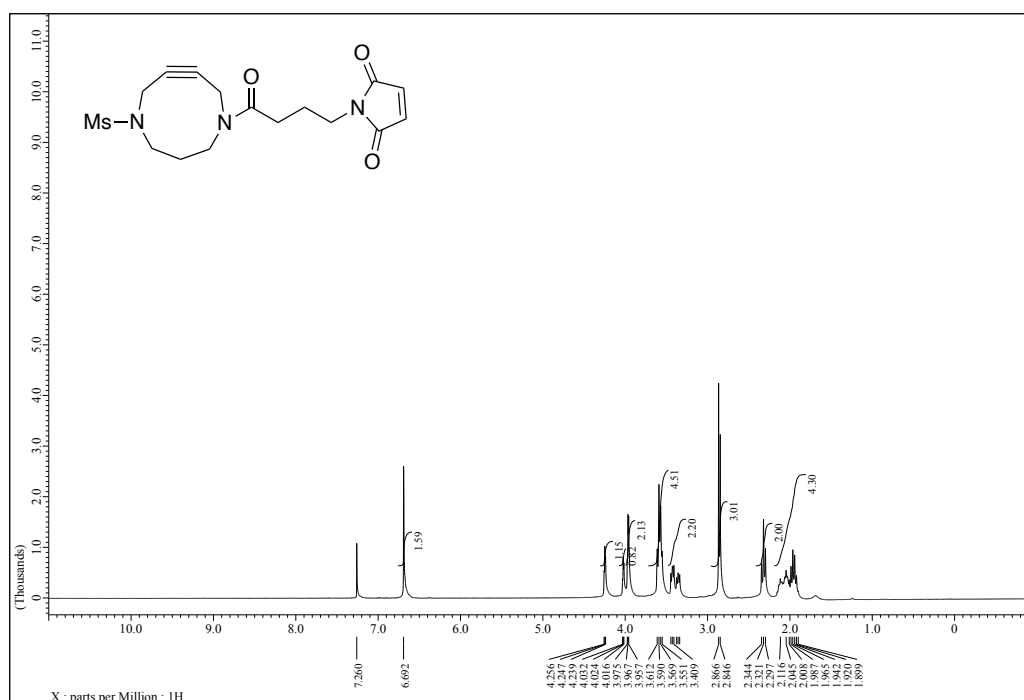

$^{13}\text{C}$  NMR Chart (75 MHz in  $\text{CDCl}_3$ ) of **2b**

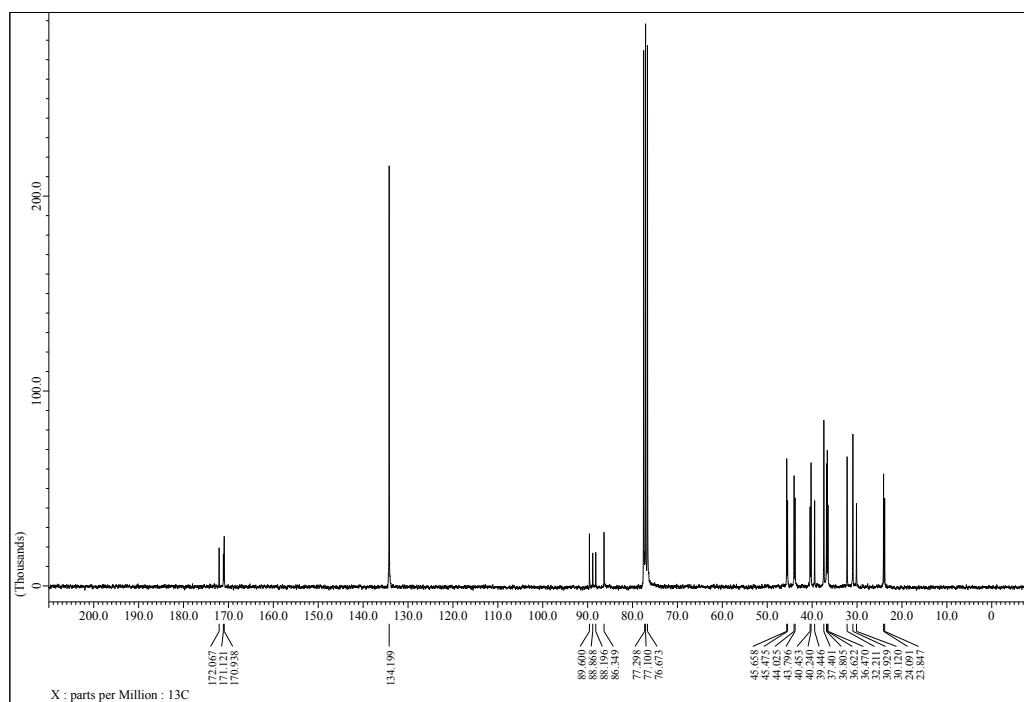

$^1\text{H}$  NMR Chart (300 MHz in  $\text{CDCl}_3$ ) of **5a**

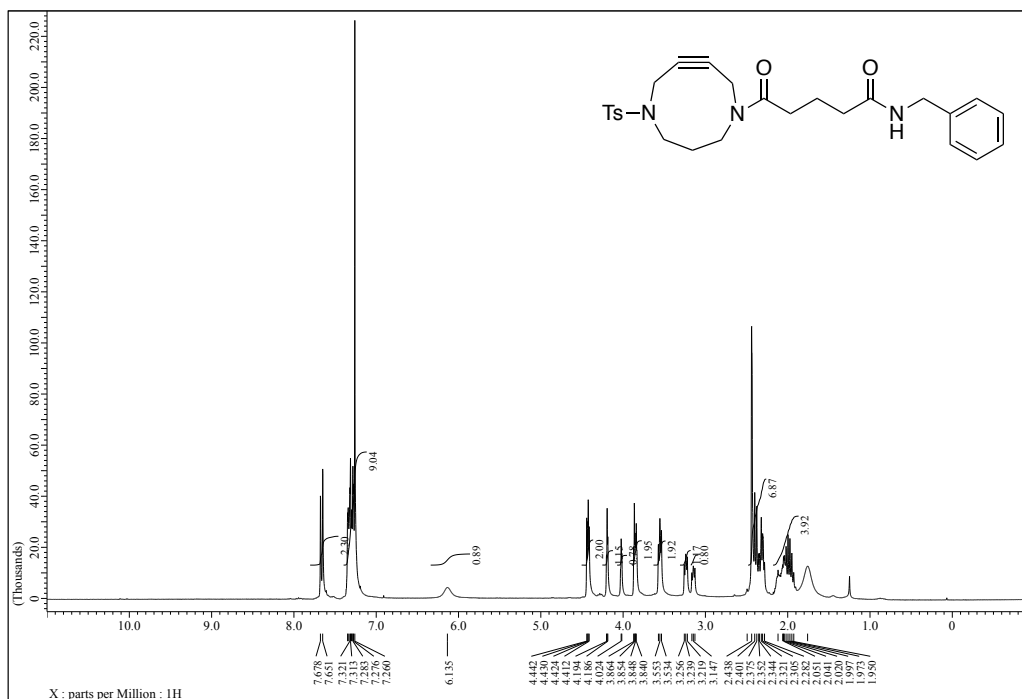

$^{13}\text{C}$  NMR Chart (100 MHz in  $\text{CDCl}_3$ ) of **5a**

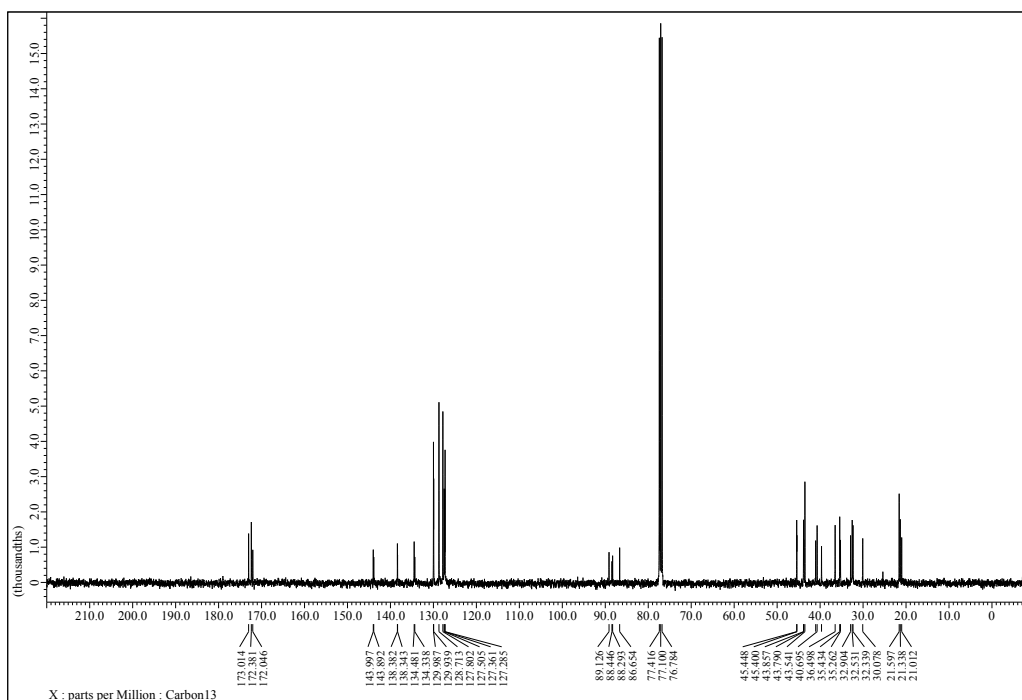

$^1\text{H}$  NMR Chart (300 MHz in  $\text{CDCl}_3$ ) of **6a**

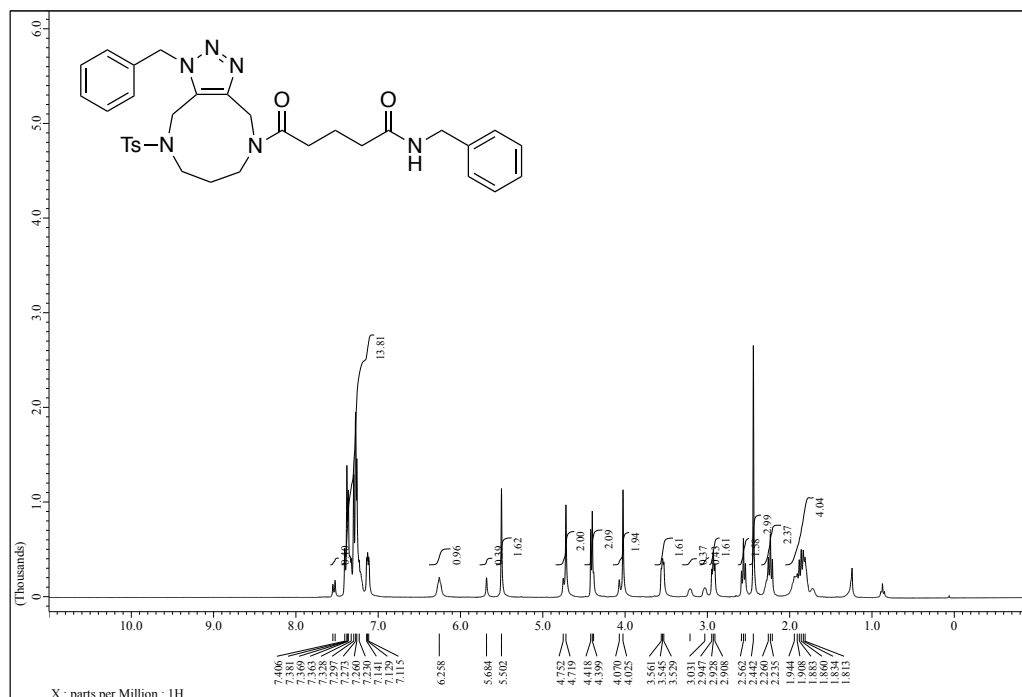

$^{13}\text{C}$  NMR Chart (75 MHz in  $\text{CDCl}_3$ ) of **6a**

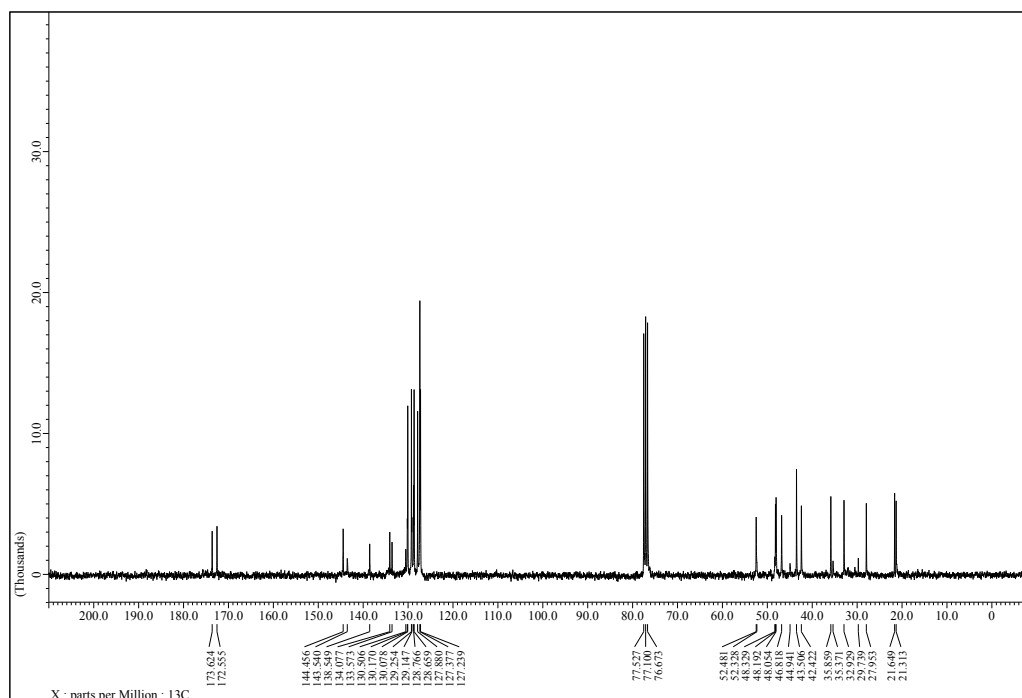

$^1\text{H}$  NMR Chart (300 MHz in  $\text{CDCl}_3$ ) of **6a'**

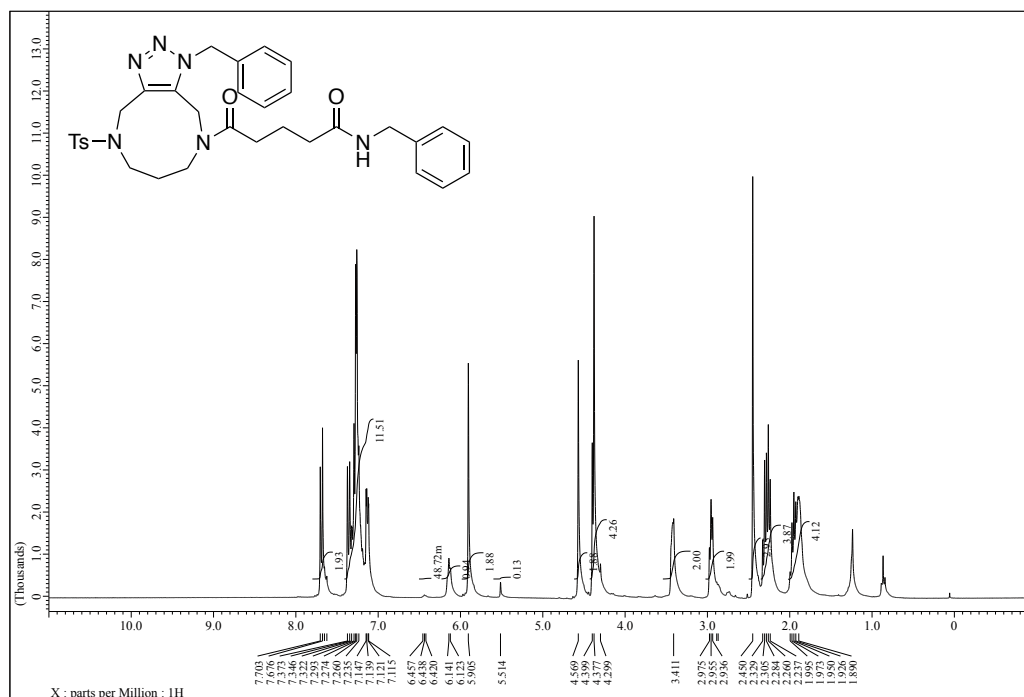

$^{13}\text{C}$  NMR Chart (75 MHz in  $\text{CDCl}_3$ ) of **6a'**

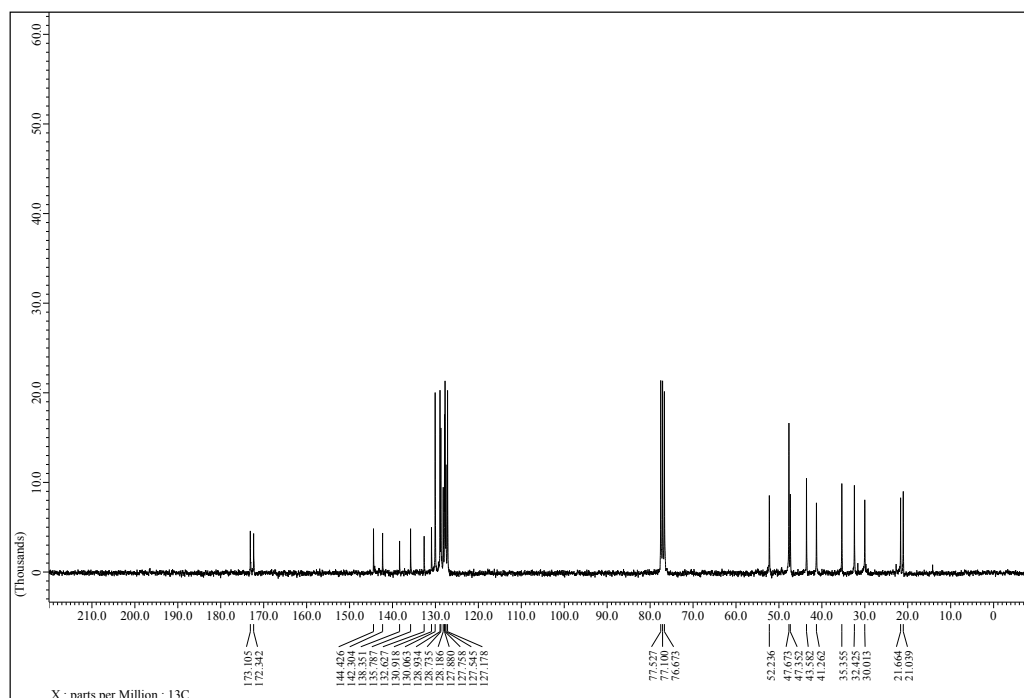



$^1\text{H}$  NMR Chart (300 MHz in  $\text{CDCl}_3$ ) of **7a**

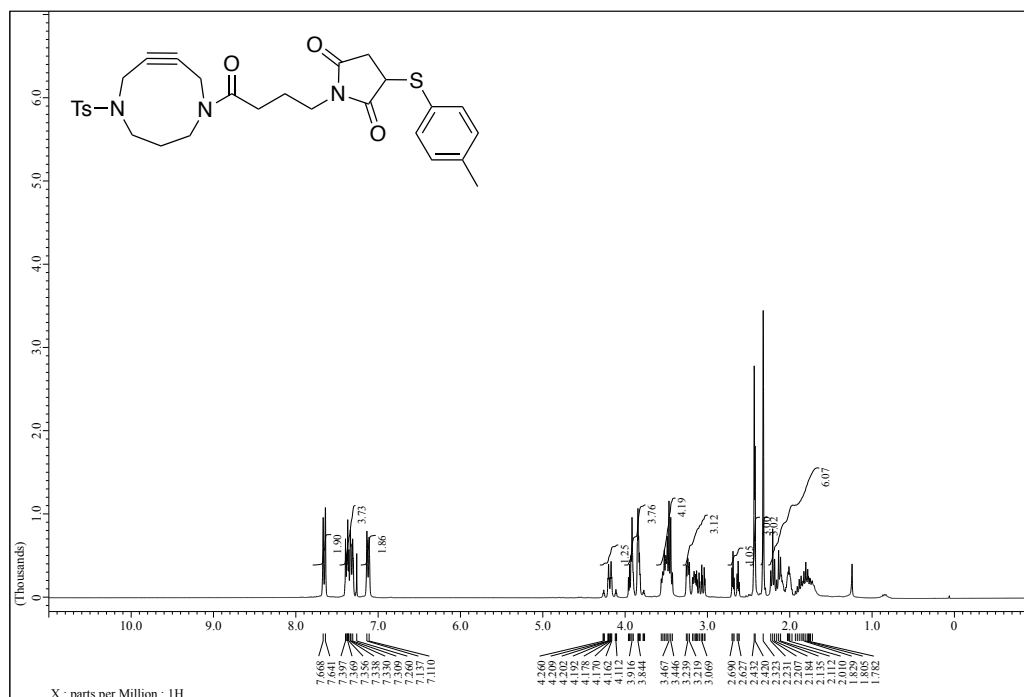

$^{13}\text{C}$  NMR Chart (75 MHz in  $\text{CDCl}_3$ ) of **7a**

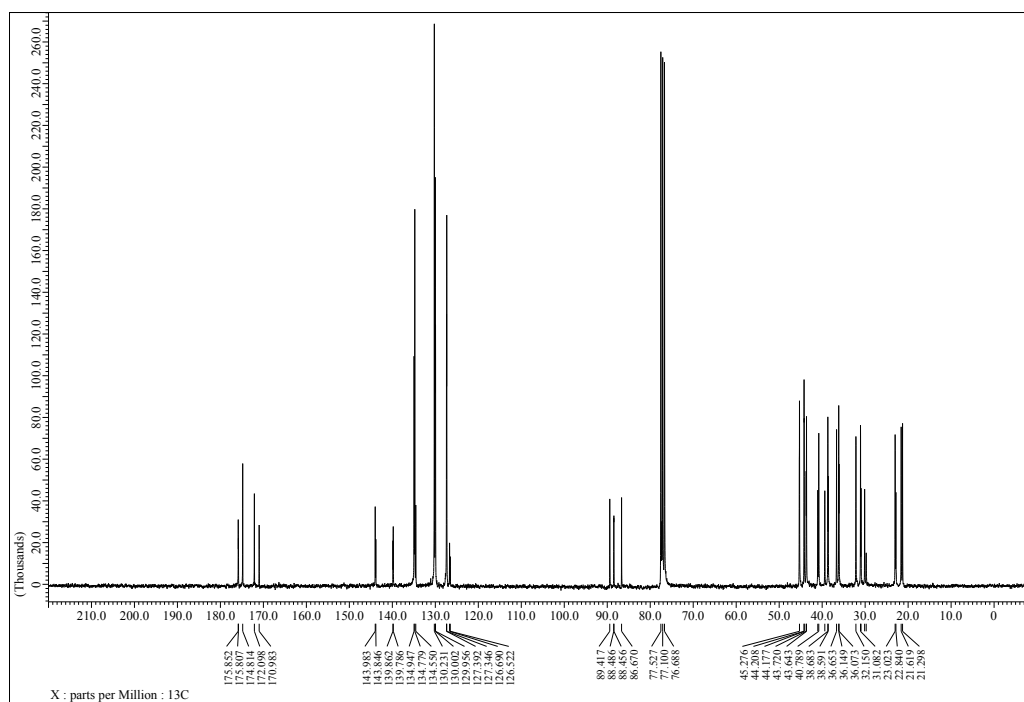

<sup>1</sup>H NMR Chart (300 MHz in CDCl<sub>3</sub>) of **8a**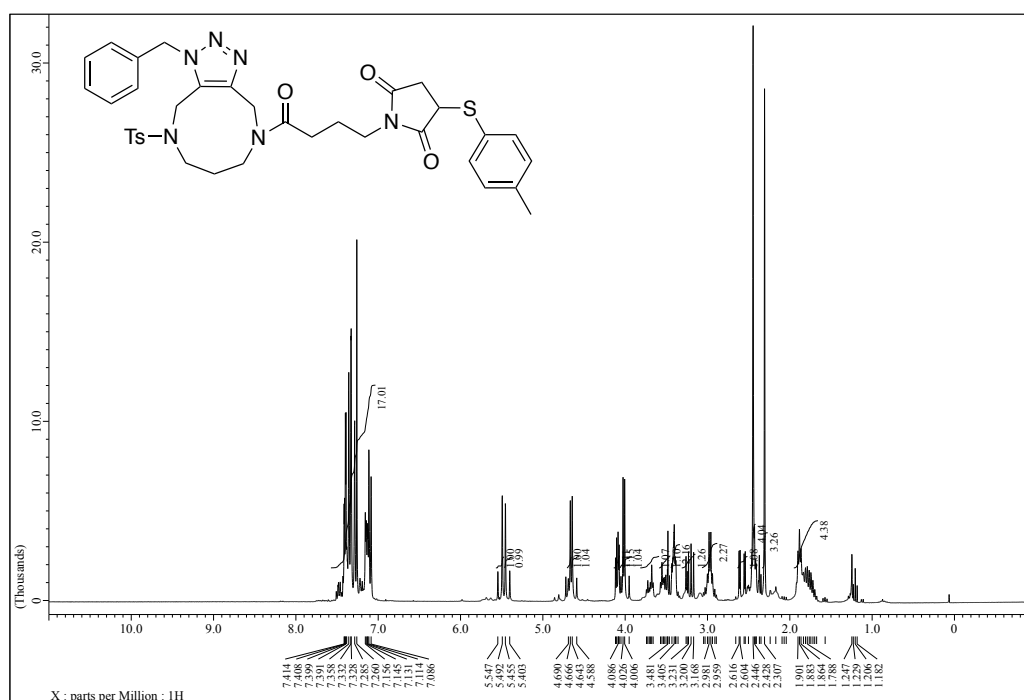

<sup>13</sup>C NMR Chart (75 MHz in CDCl<sub>3</sub> of **8a**)

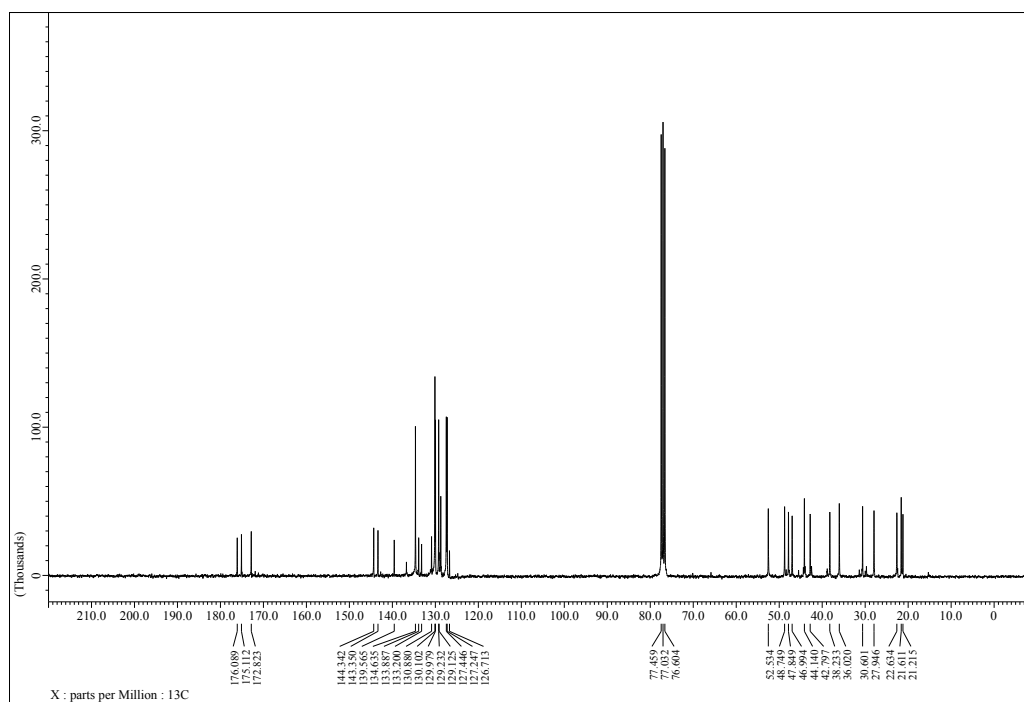

$^1\text{H}$  NMR Chart (300 MHz in  $\text{CDCl}_3$ ) of **8a'**

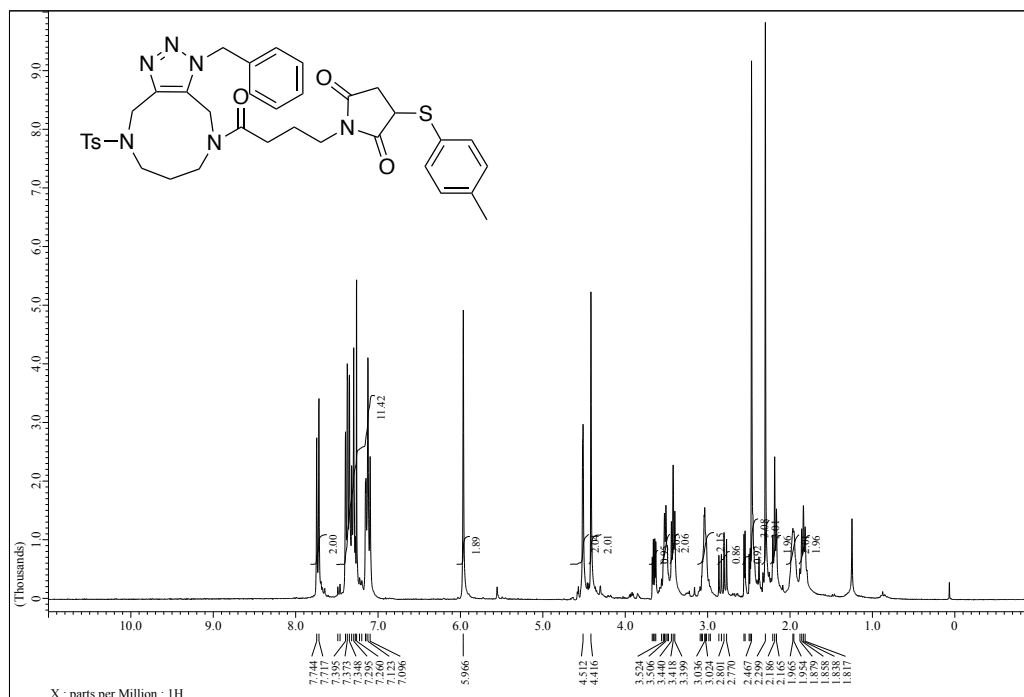

$^{13}\text{C}$  NMR Chart (75 MHz in  $\text{CDCl}_3$ ) of **8a'**

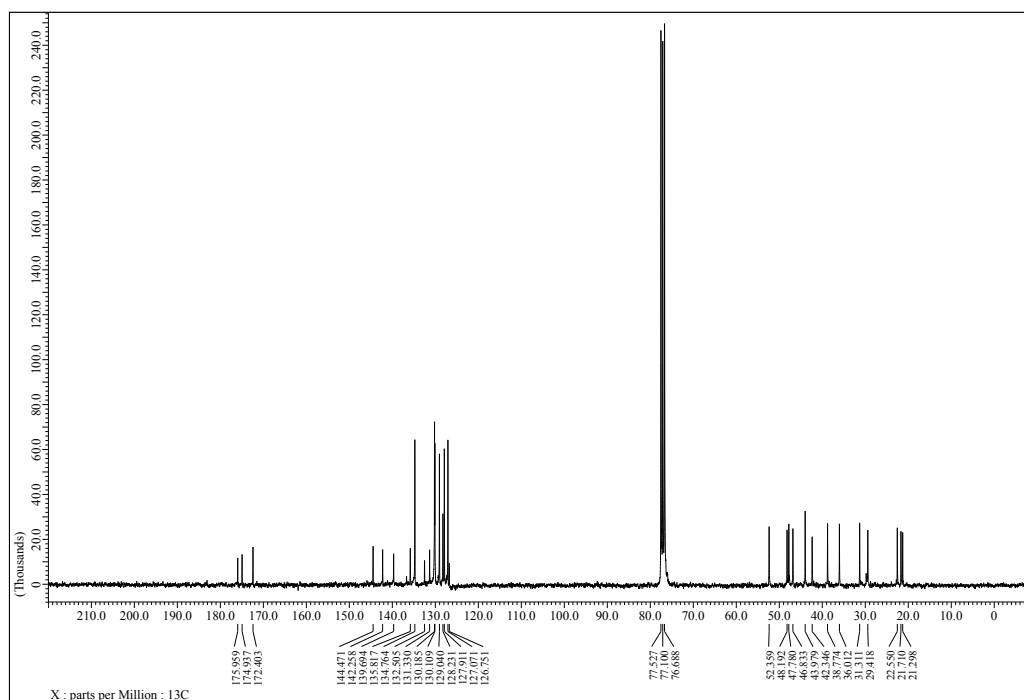

<sup>1</sup>H NMR Chart (300 MHz in CDCl<sub>3</sub>) of **s1**

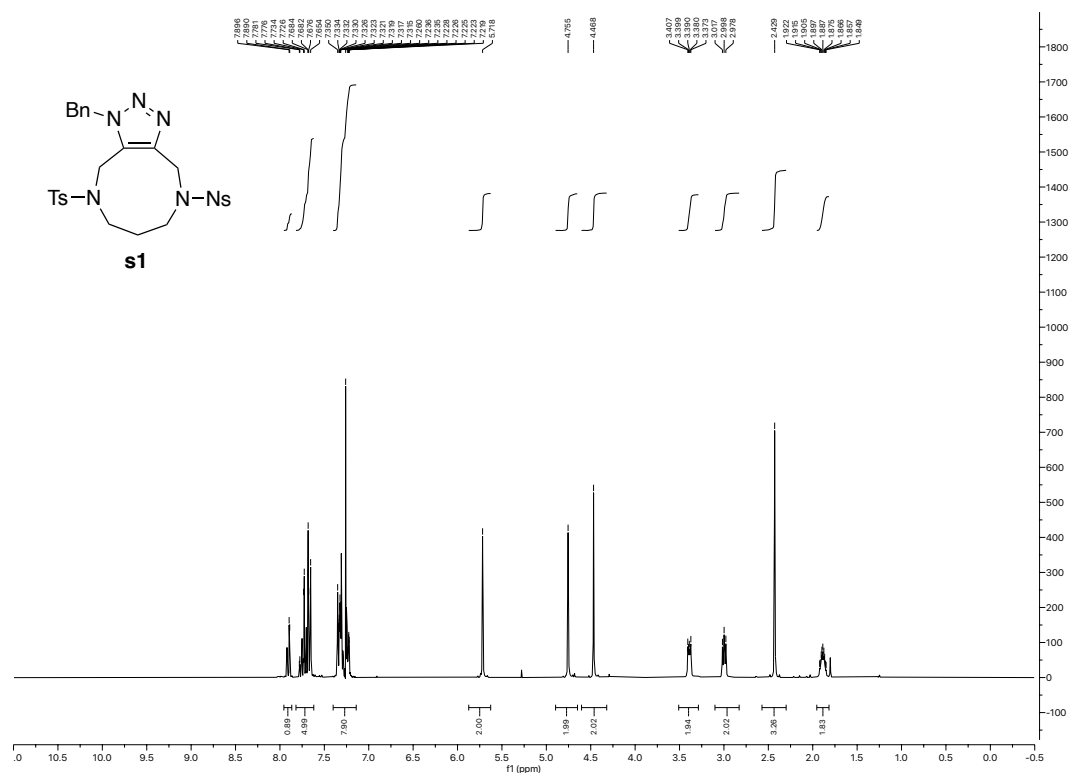

<sup>13</sup>C NMR Chart (100 MHz in CDCl<sub>3</sub>) of **s1**

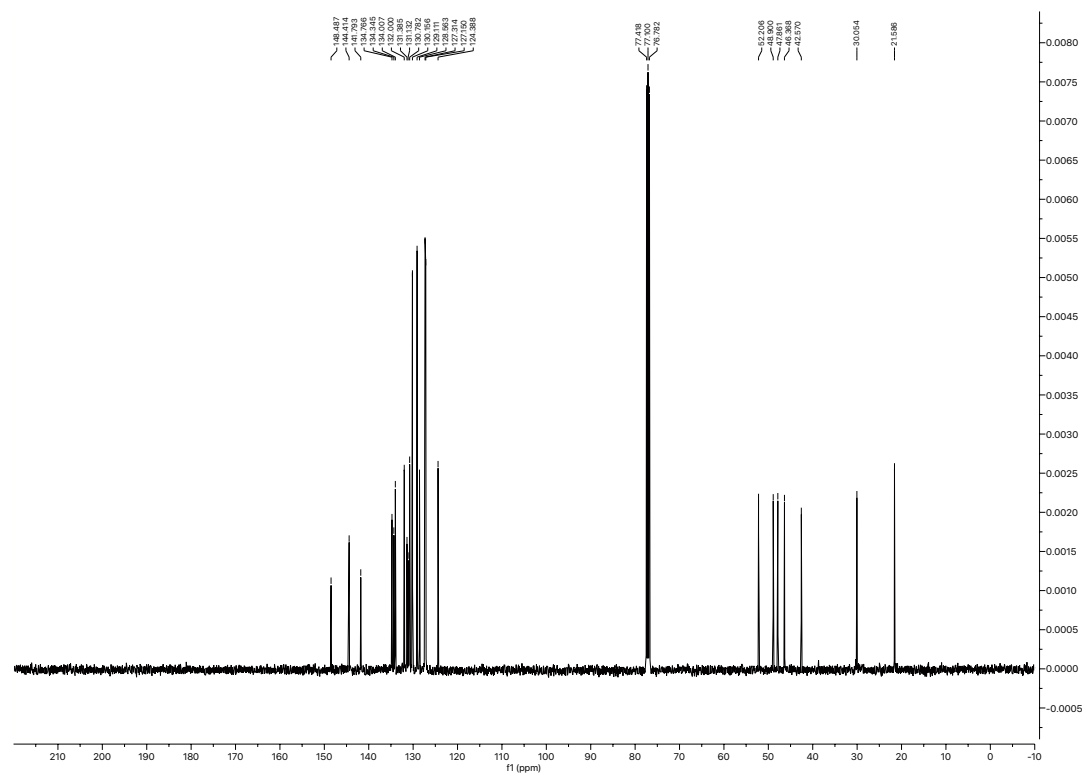

<sup>1</sup>H NMR Chart (300 MHz in CDCl<sub>3</sub>) of **s1'**

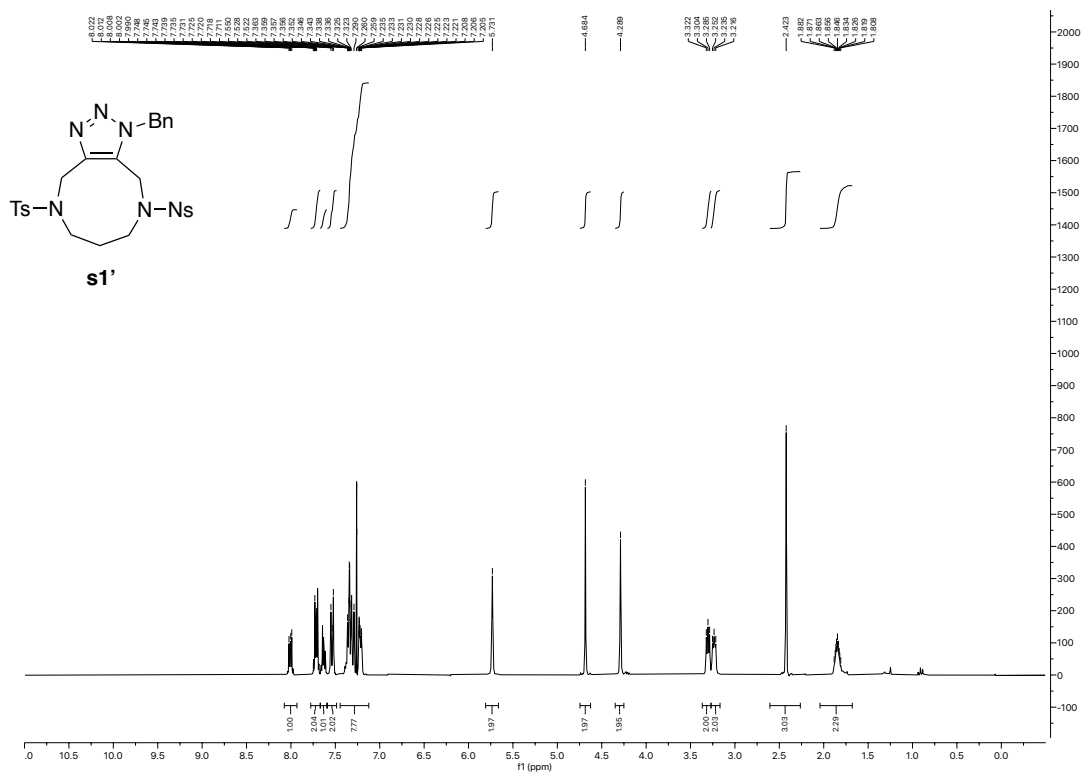

<sup>13</sup>C NMR Chart (100 MHz in CDCl<sub>3</sub>) of **s1'**

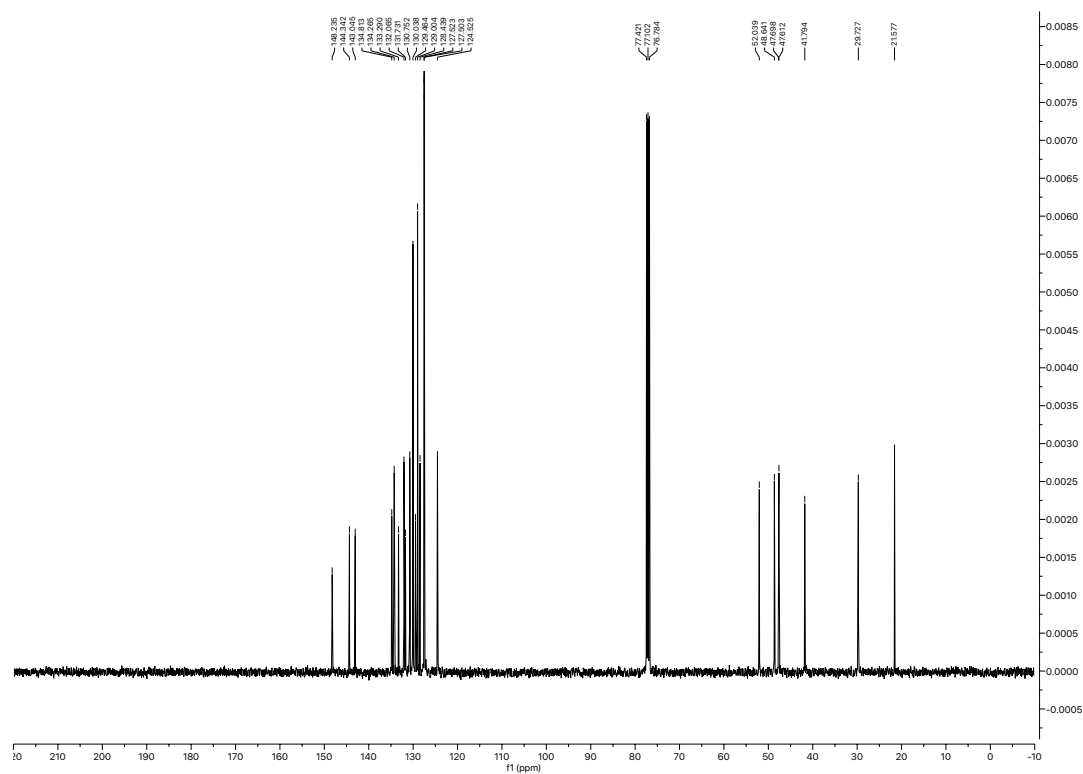

$^1\text{H}$  NMR Chart (600 MHz in  $\text{DMSO-d}_6$ ) of **s2'**

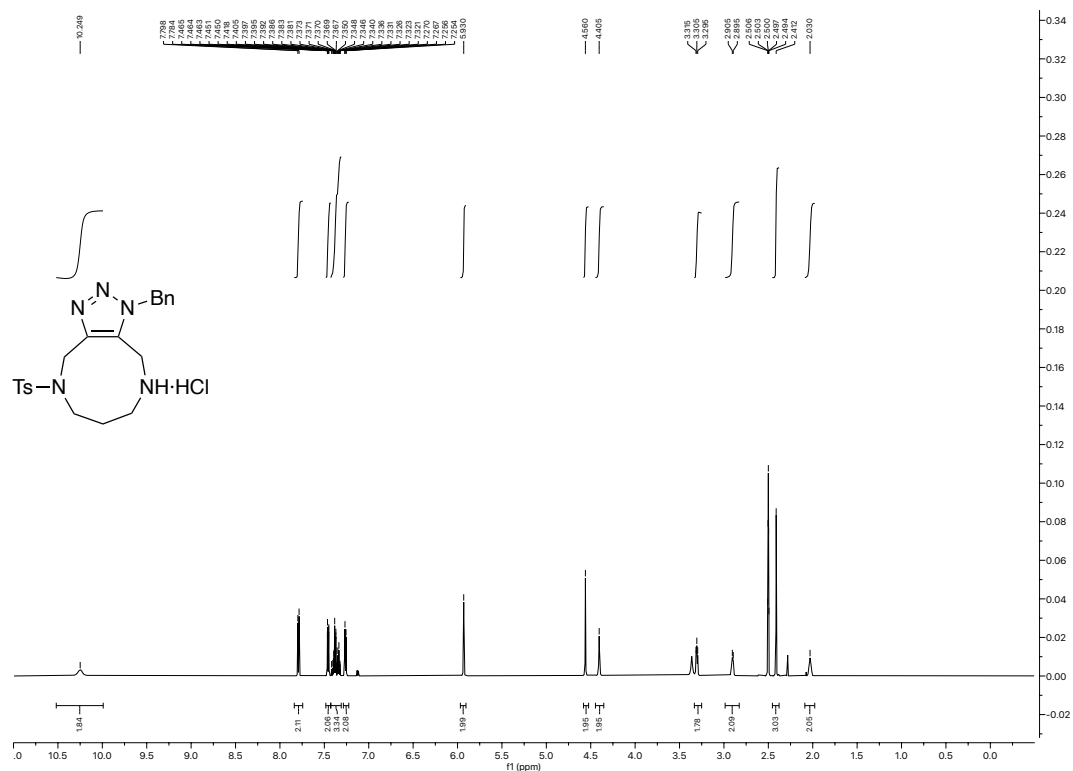

$^{13}\text{C}$  NMR Chart (150 MHz in  $\text{DMSO-d}_6$ ) of **s2'**

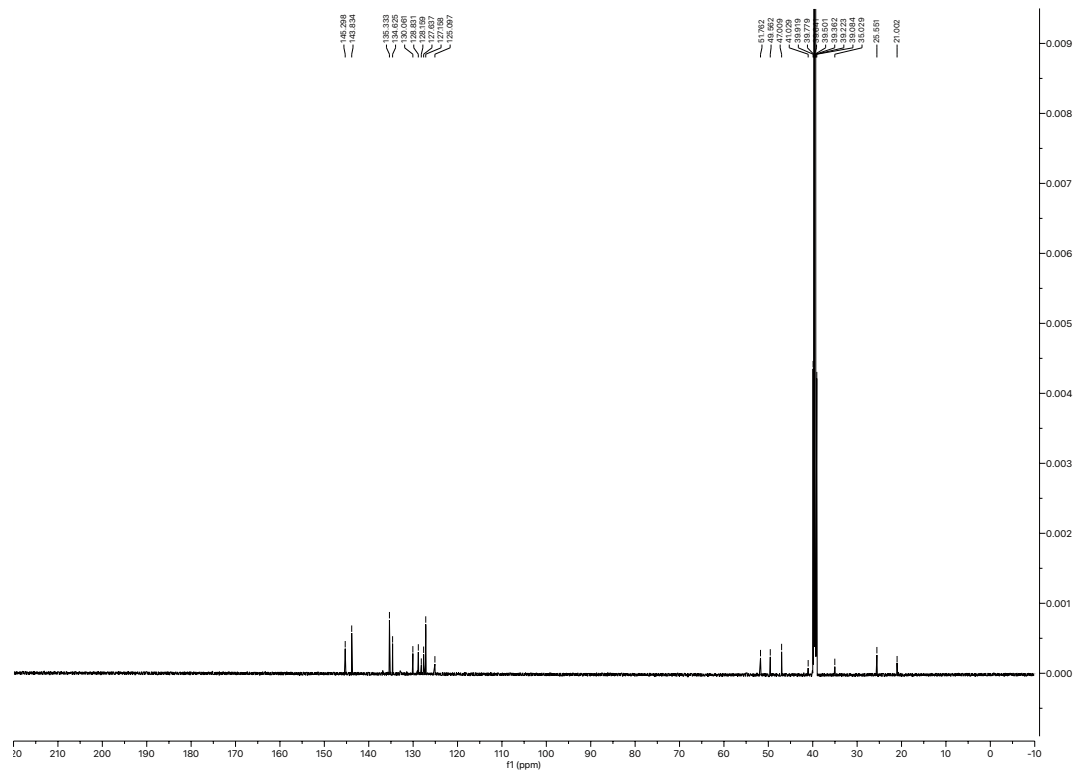

$^1\text{H}$  NMR Chart (300 MHz in  $\text{CDCl}_3$ ) of **16**

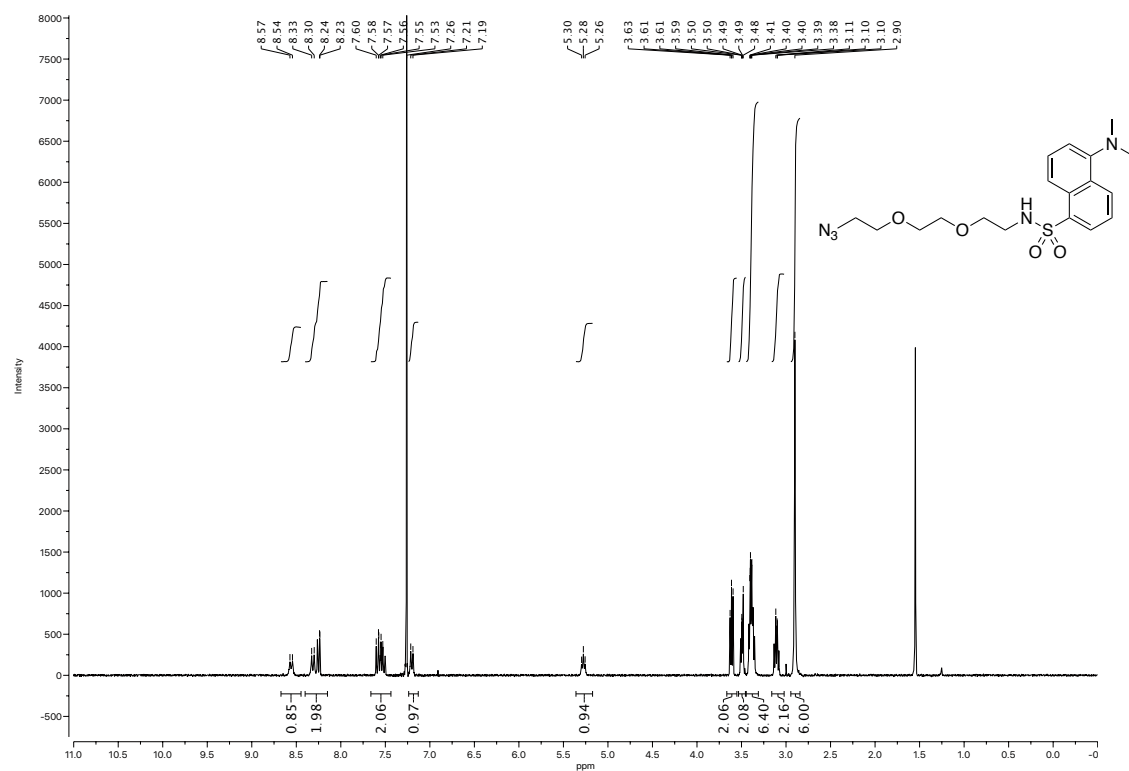

$^{13}\text{C}$  NMR Chart (75 MHz in  $\text{CDCl}_3$ ) of **16**

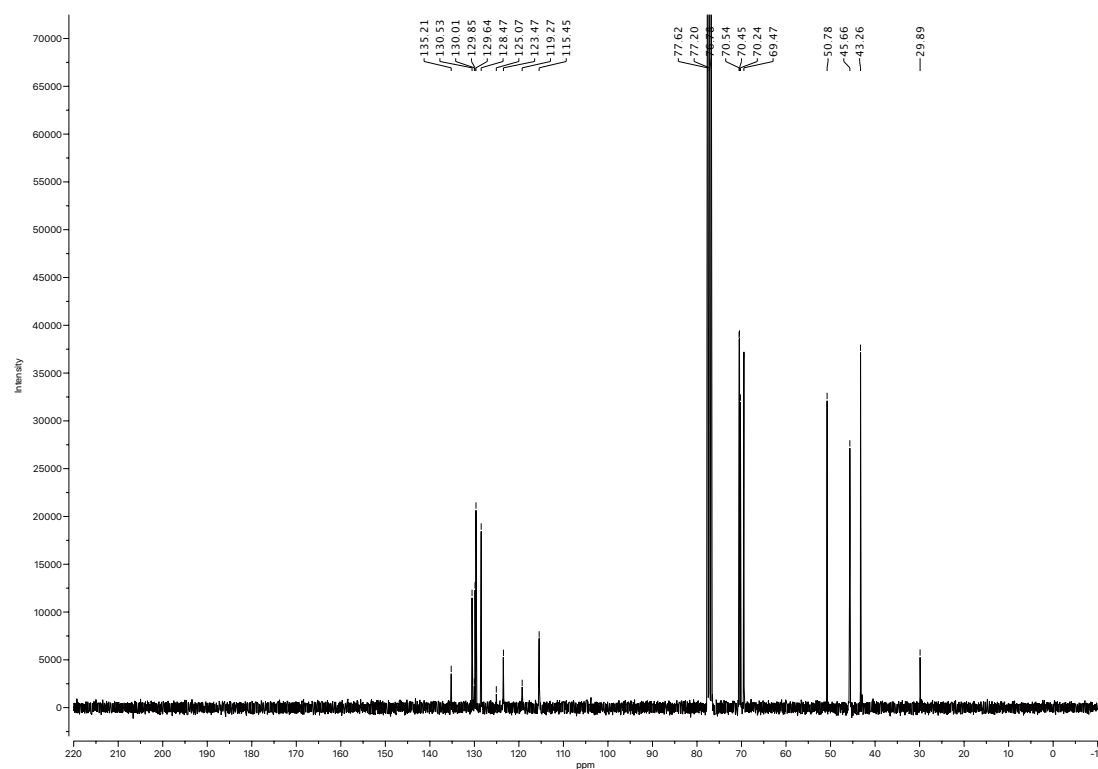

## 6. Control Experiments

### Comparison of CFAAC Rate of One Pot and Stepwise Reaction using DACN-NHS Ester

#### One Pot Reaction

The one pot reaction of benzyl azide (1.0 eq.) and benzyl amine (1.0 eq.) with **1a** (1.0 eq.) was performed in the presence of Hünig base (1.0 eq.). All compounds were mixed at concentration of  $2.5 \times 10^{-3}$  M in CD<sub>3</sub>CN in NMR tubes. Conversion of **1a** at 25 °C was monitored by <sup>1</sup>H NMR (600 MHz) analysis.

#### Stepwise Reaction

The reaction of benzyl azide (1.0 eq.) and **5a** (1.0 eq.) was performed at concentration of  $2.5 \times 10^{-3}$  M in CD<sub>3</sub>CN in NMR tubes. Conversion of **5a** at 25 °C was monitored by <sup>1</sup>H NMR (600 MHz) analysis.

After 3 h, most of **1a** was converted into **5a** in the one pot reaction. After 24 and 48 h, the both <sup>1</sup>H NMR spectra of the one pot and stepwise reactions were almost identical, which means that the CFAAC rates of the reactions are similar level.



### One Pot Reaction

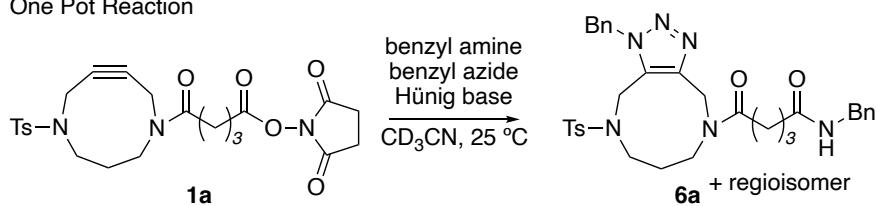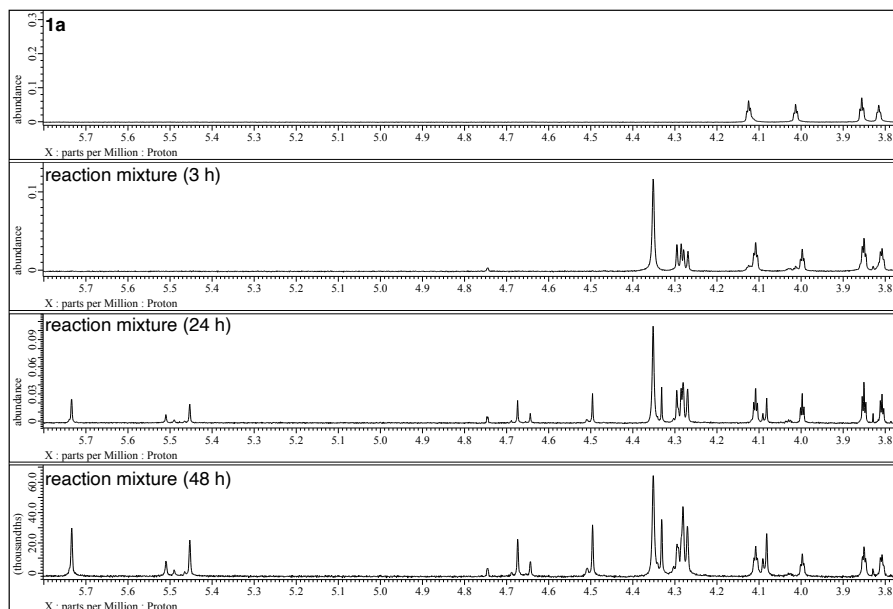

### Stepwise Reaction

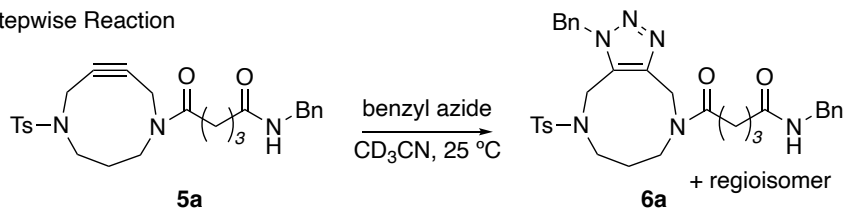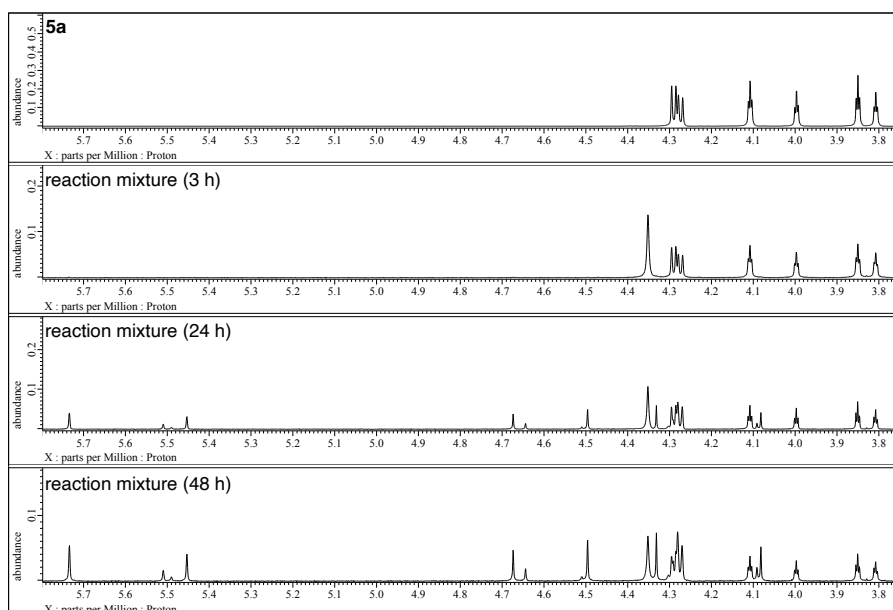

## Comparison of CFAAC Rate of One-Pot Reaction and Stepwise Reaction using DACN-Maleimide

### One Pot Reaction

The one pot reaction of benzyl azide (1.0 eq.) with *p*-toluene thiol (1.0 eq.) using **2a** (1.0 eq.) was performed in the presence of Hünig base (1.0 eq.). All compounds were mixed at concentration of  $2.5 \times 10^{-3}$  M in CD<sub>3</sub>CN in NMR tubes. Conversion of **2a** at 25 °C was monitored by <sup>1</sup>H NMR (600 MHz) analysis.

### Stepwise Reaction

The reaction of benzyl azide (1.0 eq.) and **7a** (1.0 eq.) was performed in mixed in equal moles at concentration of  $2.5 \times 10^{-3}$  M in CD<sub>3</sub>CN in NMR tubes. Conversion of **7a** at 25 °C was monitored by <sup>1</sup>H NMR (600 MHz) analysis.

After 1 h, most of **2a** was converted into **7a** in the one pot reaction. After 24 and 48 h, the both <sup>1</sup>H NMR spectra of the one pot and stepwise reactions were almost identical, which means that the CFAAC rates of the reactions are similar level.

### One Pot Reaction

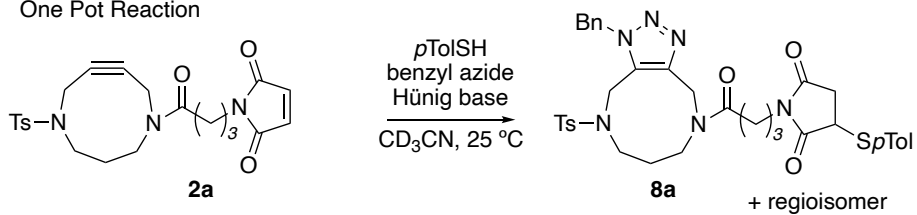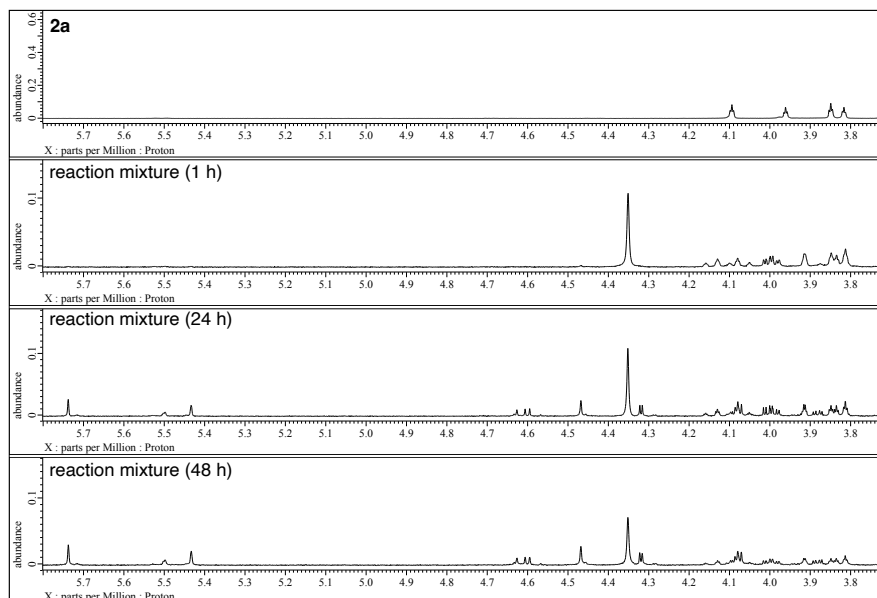

### Stepwise Reaction

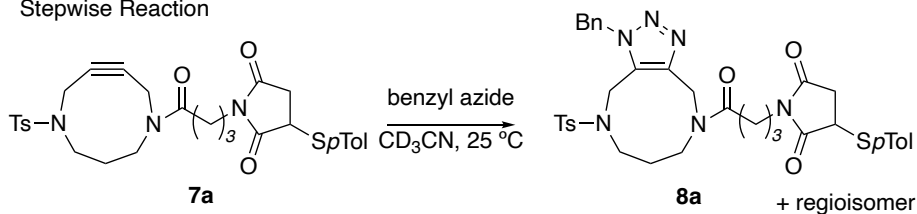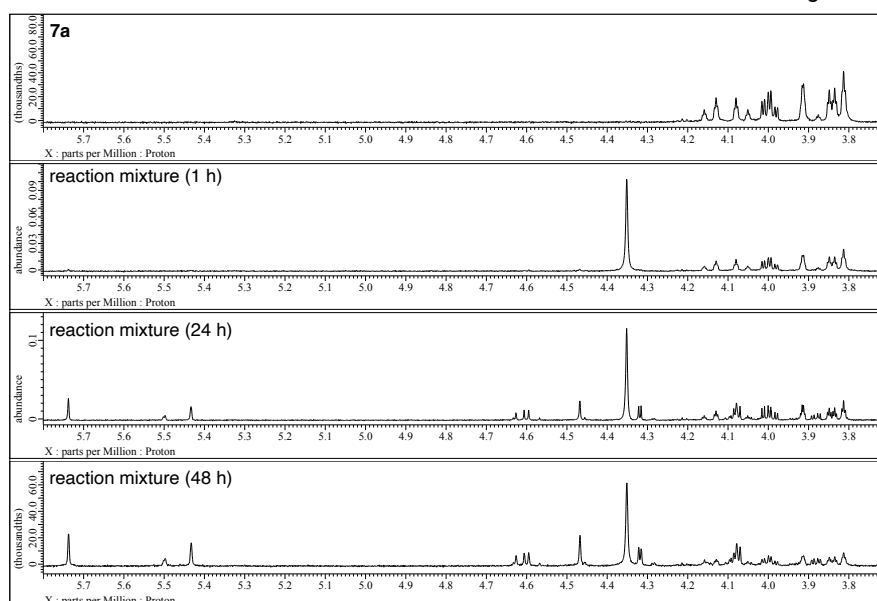

### Conjugation of Azide and Secondary Amine with NTs-DACN-NHS Ester

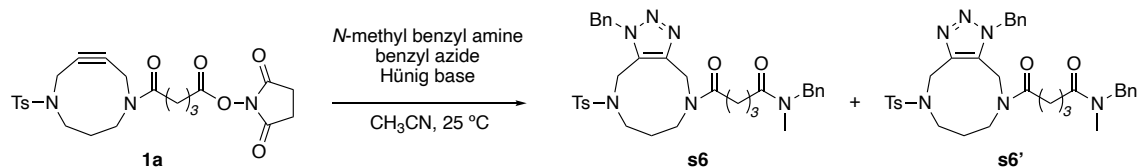

To a solution of **1a** (40.3 mg, 0.0823 mmol) in  $\text{CH}_3\text{CN}$  (4 mL) were added benzyl azide (10.3  $\mu\text{L}$ , 0.0823 mmol), *N*-methyl benzyl amine (10.6  $\mu\text{L}$ , 0.0823 mmol) and Hünig's base (14.2  $\mu\text{L}$ , 0.0823 mmol) at  $25^\circ\text{C}$ . After the mixture was stirred at that temperature for 50 h, the reaction was quenched with  $\text{H}_2\text{O}$  and extracted three times with AcOEt. The combined organic phase was dried over  $\text{Na}_2\text{SO}_4$ , filtered, and the solvent was removed under reduced pressure. The residue was purified by preparative TLC ( $\text{CHCl}_3/\text{MeOH} = 20:1$ ) to afford 46.9 mg (89%) of the regioisomere mixture of **s6** and **s6'** as colorless amorphous.

LRMS (FAB, matrix: 3-nitrobenzyl alcohol, positive): Nominal mass calcd. for  $\text{C}_{34}\text{H}_{40}\text{N}_6\text{O}_4\text{S}$   $[\text{M}+\text{H}]^+$  requires  $m/z$ : 629, found  $m/z$ : 629.

<sup>1</sup>H NMR Chart (600 MHz in CDCl<sub>3</sub>) of a mixture of **s6** and **s6'**

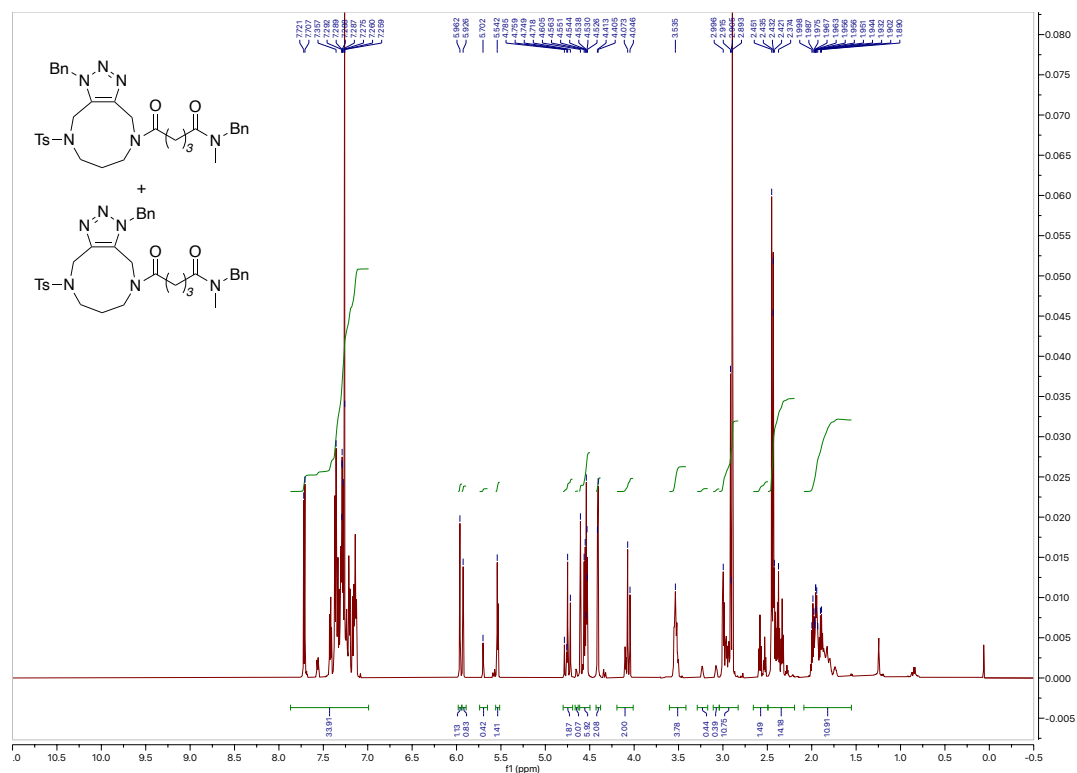

<sup>13</sup>C NMR Chart (150 MHz in CDCl<sub>3</sub>) of a mixture of **s6** and **s6'**

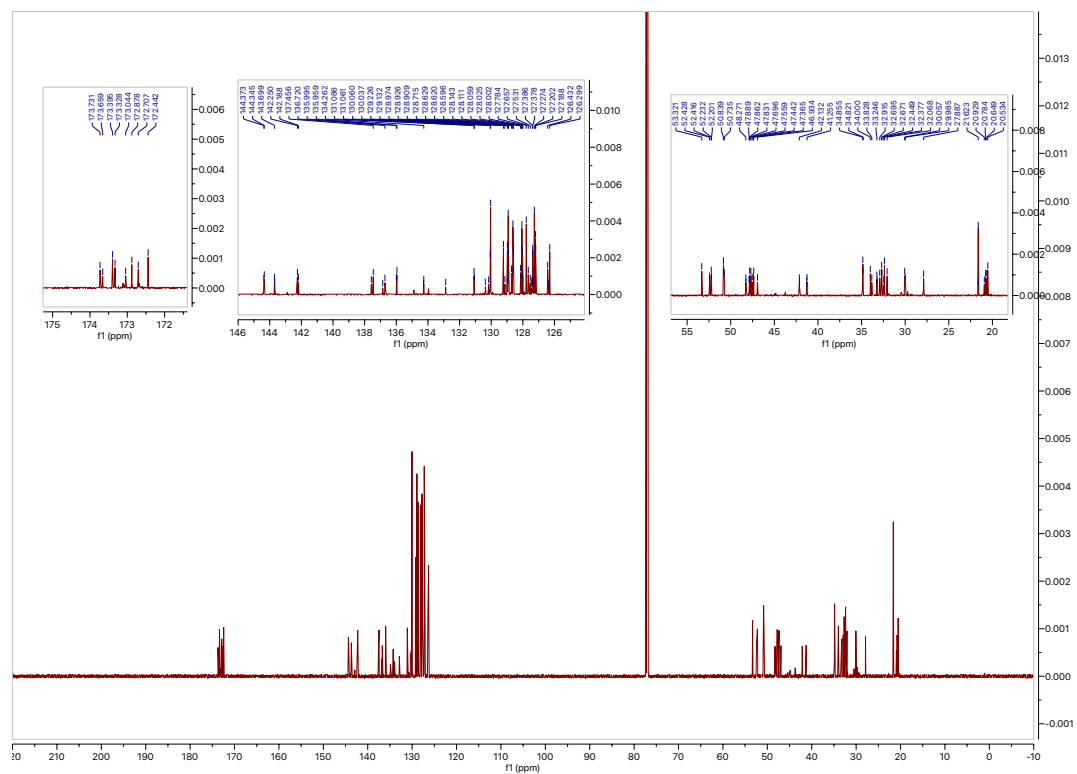

### Conjugation of Azide and Electron-Withdrawing Thiol with NTs-DACN-Maleimide

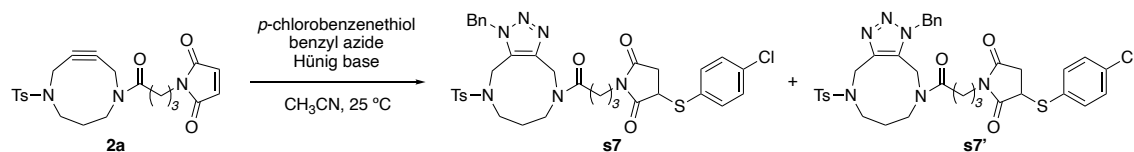

To a solution of **2a** (4.95 mg, 0.0112 mmol) in  $\text{CH}_3\text{CN}$  (0.2 mL) were added benzyl azide (0.1 mL, 0.112 M in  $\text{CH}_3\text{CN}$ ), *p*-chlorobenzenethiol (0.1 mL, 0.112 M in  $\text{CH}_3\text{CN}$ ) and Hünig base 0.1 mL, 0.112 M in  $\text{CH}_3\text{CN}$ ) at  $25^\circ\text{C}$ . After the mixture had been stirred at that temperature for 50 h, the reaction was quenched with  $\text{H}_2\text{O}$  and extracted three times with AcOEt. The combined organic phase was dried over  $\text{Na}_2\text{SO}_4$ , filtered, and the solvent was removed under reduced pressure. The residue was purified by preparative TLC ( $\text{CHCl}_3/\text{MeOH} = 20:1$ ) to afford 6.8 mg (84%) of the regioisomere mixture of **s7** and **s7'** as colorless amorphous.

LRMS (FAB, matrix: 3-nitrobenzyl alcohol, positive): Nominal mass calcd. for  $\text{C}_{33}\text{H}_{37}\text{ClN}_6\text{O}_5\text{S}_2$   $[\text{M}+\text{H}]^+$  requires  $m/z$ : 721, found  $m/z$ : 721.

<sup>1</sup>H NMR Chart (600 MHz in CDCl<sub>3</sub>) of a mixture of **s7** and **s7'**

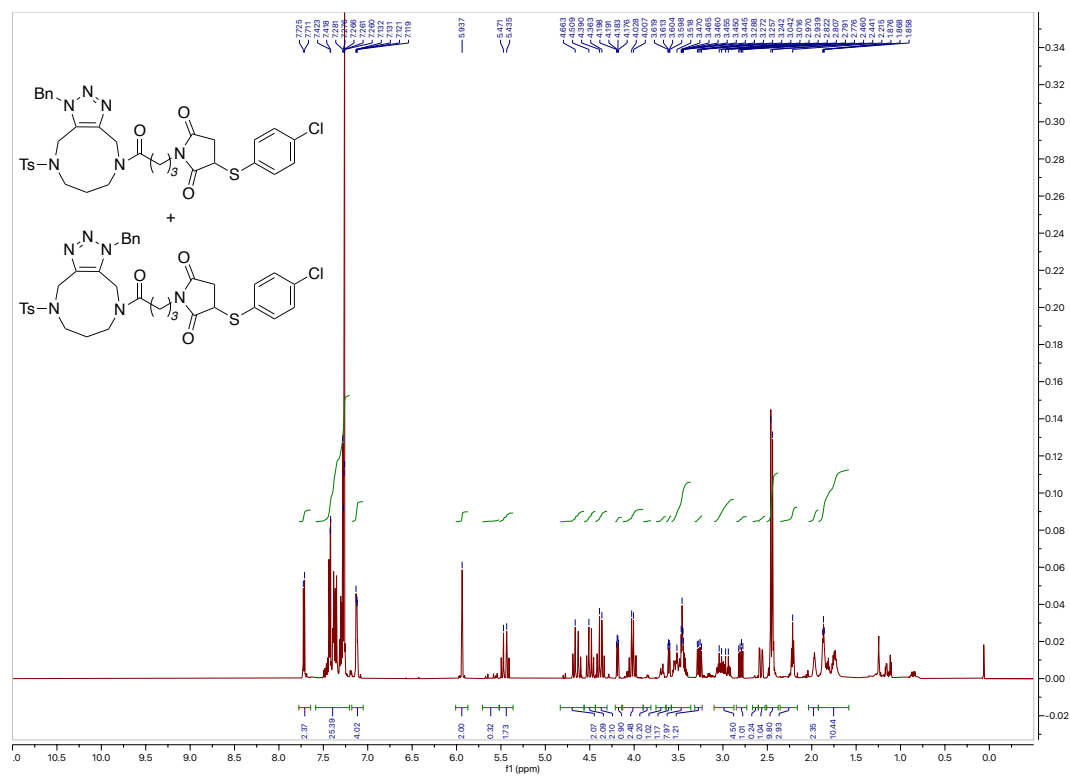

<sup>13</sup>C NMR Chart (150 MHz in CDCl<sub>3</sub>) of a mixture of **s7** and **s7'**

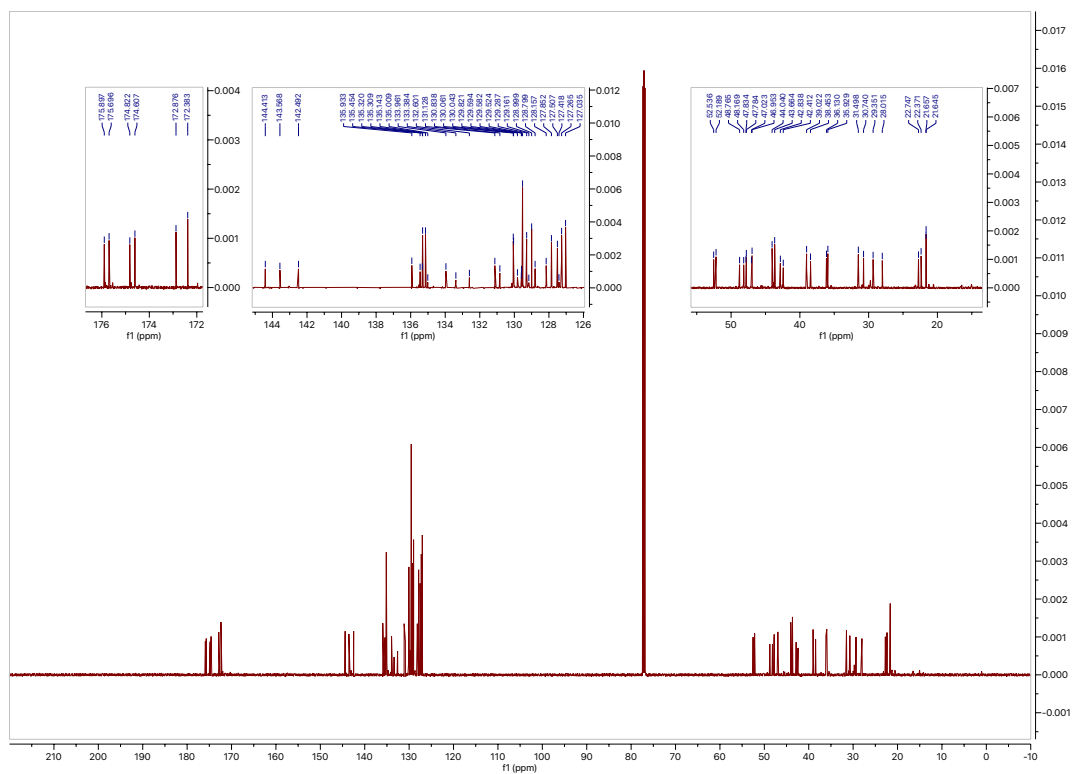

## Comparison of Reactivity and Stability of DBCO Derivative and DACN

### CFAAC Reactivity

The reactions of DBCO **s8** (1.0 eq.) or NTs-DACN **s9** (1.0 eq.) with benzyl azide (1.0 eq.) was performed in the presence of internal standard [1,3,5-trimethoxybenzene (1.0 eq.)]. All compounds were mixed at concentration of  $2.5 \times 10^{-3}$  M in  $\text{CD}_3\text{CN}$  in NMR tubes. Conversion of **s8** or **s9** at 25 °C were monitored by  $^1\text{H}$  NMR (600 Mz) analysis. After 3 h, 90% of **s8** and 21% of **s9** were consumed. After 24 h, almost of all **s8** was consumed and provided 96 % (NMR yield) of triazole. On the other hand, 45% of **s9** were consumed. After 48 h, 65% of **s9** was consumed and provided 63 % (NMR yield) of triazole (remainig **s9**: 35%).

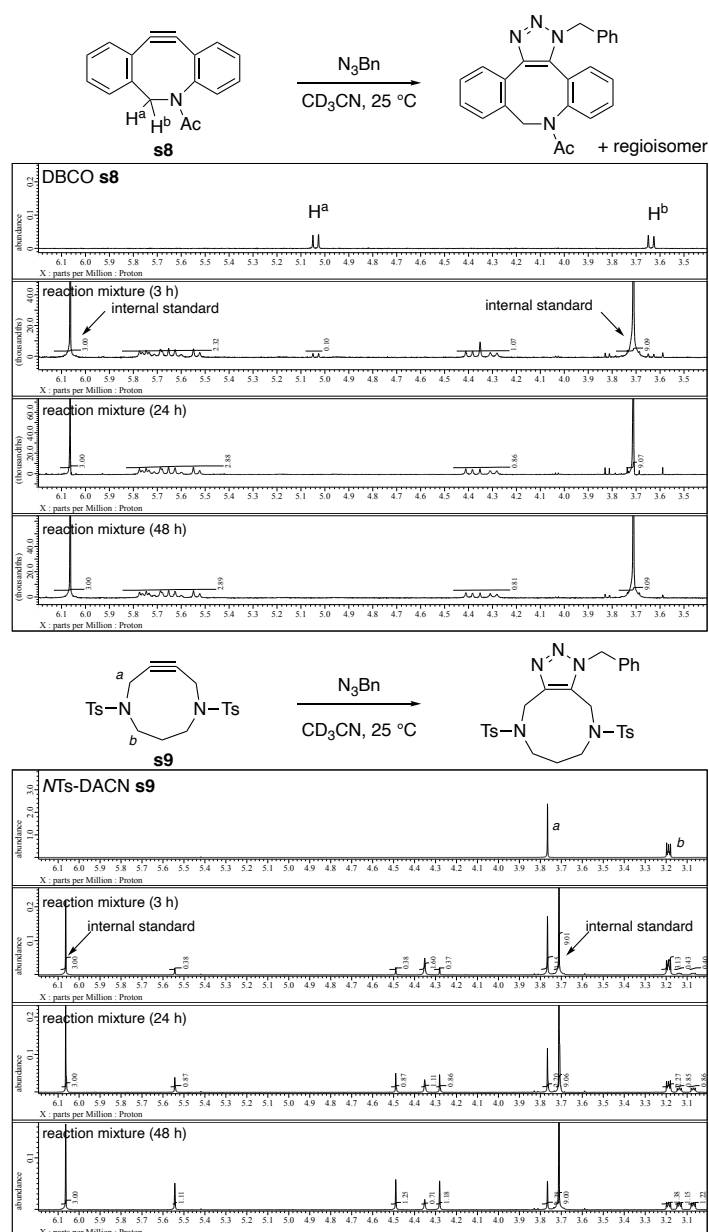



## Tolerance toward Thiol

The reactions of DBCO **s8** (1.0 eq.) or NTs-DACN **s9** (1.0 eq.) and *p*-toluene thiol (1.0 eq.) using Hünig's base (1.0 eq.) was performed in the presence of internal standard [1,3,5-trimethoxybenzene (1.0 eq.)]. All compounds were mixed at concentration of  $2.5 \times 10^{-3}$  M in CD<sub>3</sub>CN in NMR tubes. Conversion of **s8** or **s9** at 25 °C were monitored by <sup>1</sup>H NMR (600 Mz) analysis. After 3, 24 and 48 h, 27, 42 and 51 % of **s8** was consumed respectively. On the other hand, consumption of **s9** was not observed.

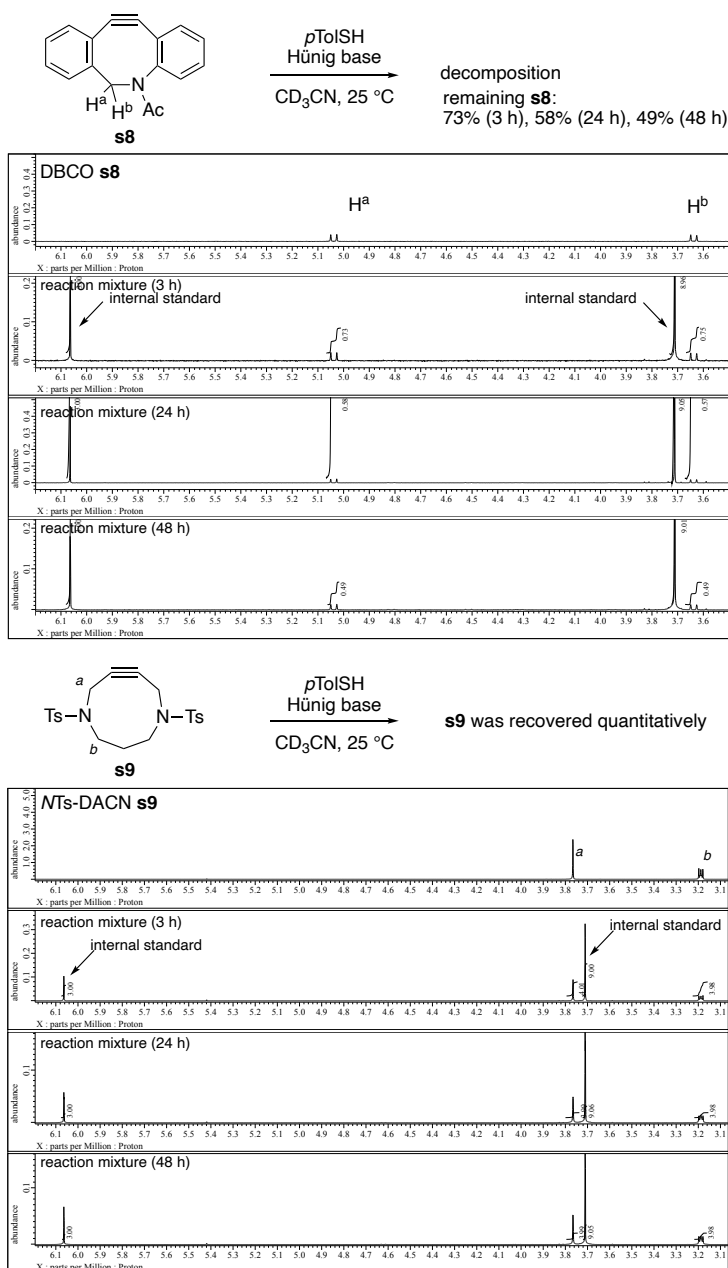

## Thermal Stability

Thermal reaction of **s8** or **s9** was performed in the presence of internal standard [1,3,5-trimethoxybenzene (1.0 eq.)]. All compounds were mixed at concentration of  $2.5 \times 10^{-3}$  M in  $\text{CD}_3\text{CN}$  in NMR tubes. The NMR tubes were sealed and heated to  $80^\circ\text{C}$  in oil bath. Conversion of **s8** or **s9** were monitored by  $^1\text{H}$  NMR (600 Mz) analysis. After 3, 24 and 48 h, 3, 6 and 12 % of **s8** was consumed respectively. On the other hand, consumption of **s9** was not observed.

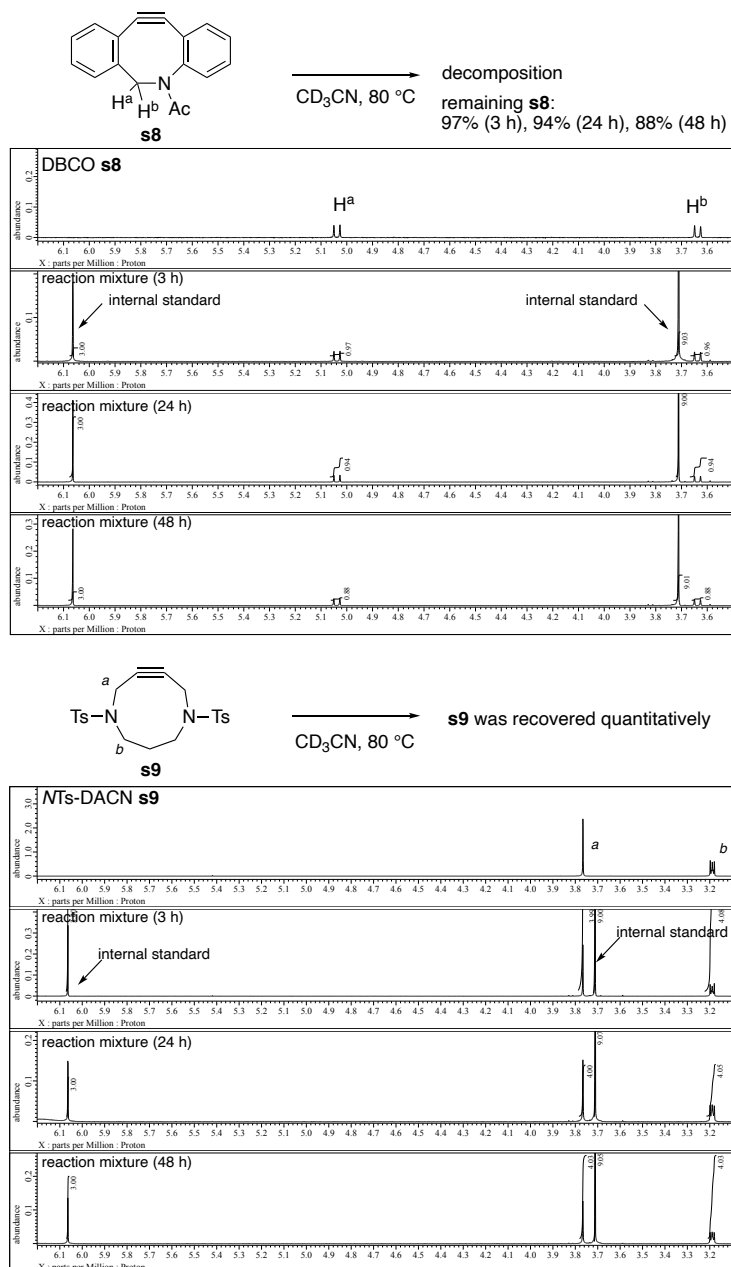

## 7. References

- (1) Y. Kawasaki, Y. Yamanaka, Y. Seto, K. Igawa and K. Tomooka, *Chem. Lett.* 2019, **48**, 495.
- (2) X. Li and P. Kohli, *J. Phys. Chem. C* 2010, **114**, 6255.
- (3) A. V. Dix, L. Fischer, S. Sarrazin, C. P. H. Redgate, J. D. Esko and Y. Tor, *ChemBioChem* 2010, **11**, 2302.
